1 **Expansion of a core regulon by transposable elements promotes Arabidopsis**  
2 **chemical diversity and pathogen defense**

3

4 Brenden Barco\* (1), Yoseph Kim (2), and Nicole K. Clay (1)

5

6 \*Correspondence should be addressed to B. Barco (brenden.barco@yale.edu)

7

8 Current addresses:

9 (1) Department of Molecular, Cellular & Developmental Biology, Yale University, Kline  
10 Biology Tower 734, 219 Prospect St., New Haven, CT 06511

11 (2) Hopkins School, 986 Forest Rd, New Haven, CT 06515

## 12 **Abstract**

13 Plants synthesize hundreds of thousands of ecologically specialized, lineage-specific  
14 metabolites through biosynthetic gene duplication and functional specialization.  
15 However, the rewiring of duplicated genes into existing regulatory networks remains  
16 unclear. We show that the duplicated gene *CYP82C2* was recruited into the WRKY33  
17 regulon and indole-3-carbonitrile (ICN) biosynthetic pathway through exaptation of a  
18 retroduplicated LINE retrotransposon (*EPCOT3*) into a novel enhancer. The stepwise  
19 development of a chromatin-accessible WRKY33-binding site on *EPCOT3* potentiated  
20 the regulatory neofunctionalization of *CYP82C2* and the evolution of inducible defense  
21 metabolite 4-hydroxy-ICN in *Arabidopsis thaliana*. Transposable elements (TEs) have  
22 long been recognized to have the potential to rewire regulatory networks; these results  
23 establish a more complete understanding of how duplicated genes and TEs contribute  
24 in concert to chemical diversity and pathogen defense.

25  
26 Plant secondary or specialized metabolites are essential for plant survival in co-  
27 evolving biotic and fluctuating abiotic environments. The evolutionary process of  
28 chemical innovation resulted in the collective synthesis of hundreds of thousands of  
29 ecologically specialized, mostly lineage-specific metabolites (Chae et al., 2014; Weng  
30 et al., 2012; Dixon and Strack, 2003; Wink, 2003). Plant specialized metabolic enzymes  
31 are ultimately produced from primary metabolic enzymes through gene duplication and  
32 subsequent functional divergence of one or both paralogs to produce enzymes with  
33 altered expression patterns and/or protein functions (Ohno, 1970; Force et al., 1999;  
34 Weng et al., 2012). They are also often organized into transcription factor (TF) regulons

35 of co-regulated genes for optimal timing, amplitude, and tissue-specific pathway gene  
36 expression and subsequent metabolite accumulation (Grotewold, 2005; Hartmann,  
37 2007; Martin *et al.*, 2010; Tohge & Fernie, 2012; Omranian *et al.*, 2015).

38

39 Changes in *cis*-regulatory modules such as enhancers and promoters can accelerate  
40 the capture of duplicated genes into regulons, thus driving phenotypic diversity (Levine  
41 and Davidson, 2005; Prud'homme *et al.*, 2007; Wray, 2007; Wittkopp & Kalay, 2012;  
42 Rogers *et al.*, 2013). Enhancers consist of transcription factor binding sites (TFBSs)  
43 and are derived either through mutation or co-option of a TFBS-carrying transposable  
44 element (TE) (Spitz & Furlong, 2012; Wittkopp & Kalay, 2012). TE exaptations have  
45 been hypothesized to be responsible for the rapid transcriptional rewiring of gene  
46 regulatory networks in ancient lineages of vertebrates (Feschotte 2008; Bourque 2009;  
47 Lynch *et al.*, 2011; de Souza *et al.*, 2013; Chuong *et al.*, 2016) and plants (Hénaff *et al.*,  
48 2014), but the physiological significance of this rewiring, if any, is still unknown.

49

50 Bacteria elicit two primary immune defense modes in plants, pattern- and effector-  
51 triggered immunity (PTI and ETI) (Jones & Dangl, 2006). Pathogenic bacteria  
52 additionally compromise PTI via specific virulence effector proteins (effector-triggered  
53 susceptibility, ETS; Jones & Dangl, 2006). PTI involves the extracellular perception of  
54 conserved molecules known as microbe-associated molecular patterns (MAMPs),  
55 whereas ETI involves the cytosolic perception of effectors. Although ETI results in the  
56 formation of more rapid and robust pathogen-specific response including the  
57 hypersensitive response (HR), a form of programmed cell death (Jones & Dangl, 2006),

58 both result in the ability of naïve host cells to generate, through non-self perception  
59 and subsequent transcriptional reprogramming, pathogen-inducible specialized  
60 metabolites necessary for defense (Hammerschmidt, 1999; Mansfield, 2000; Clay *et al.*,  
61 2009).

62  
63 Three pathogen-inducible tryptophan (Trp)-derived defense metabolites – camalexin,  
64 4-methoxyindol-3-ylmethylglucosinolate (4M-I3M), and 4-hydroxyindole-3-  
65 carbonylnitrile (4OH-ICN) – have been shown to expand innate immunity in *Arabidopsis*  
66 *thaliana* (Bednarek *et al.*, 2009; Clay *et al.*, 2009; Thomma *et al.*, 1999; Tsuji *et al.*,  
67 1992; Rajniak *et al.*, 2015). The three biosynthetic pathways share an early step, which  
68 is the conversion of Trp to indole-3-acetaldoxime (IAOx) via the genetically redundant  
69 P450 monooxygenases CYP79B2 and CYP79B3 (Fig. 1a) (Zhao *et al.*, 2002;  
70 Glawischnig *et al.*, 2004; Rajniak *et al.*, 2015). The camalexin and 4OH-ICN pathways  
71 additionally share the conversion of IAOx to indole-3-cyanohydrin (ICY) by partially  
72 redundant P450s CYP71A12 and CYP71A13 (Fig. 1a) (Nafisi *et al.*, 2007; Klein *et al.*,  
73 2013; Rajniak *et al.*, 2015). CYP71A13 and CYP71B15/PAD3 catalyze further reactions,  
74 leading to camalexin production, whereas the flavin-dependent oxidase FOX1/AtBBE3  
75 and P450 CYP82C2 convert ICY to 4OH-ICN (Fig. 1a) (Nafisi *et al.*, 2007; Böttcher *et*  
76 *al.*, 2009; Rajniak *et al.*, 2015). 4M-I3M is widely distributed across the mustard family  
77 (Brassicaceae), whereas camalexin is restricted to the Camelinae tribe of  
78 Brassicaceae (Bednarek *et al.*, 2011). The evolutionary conservation of 4OH-ICN has  
79 not yet been investigated.

80

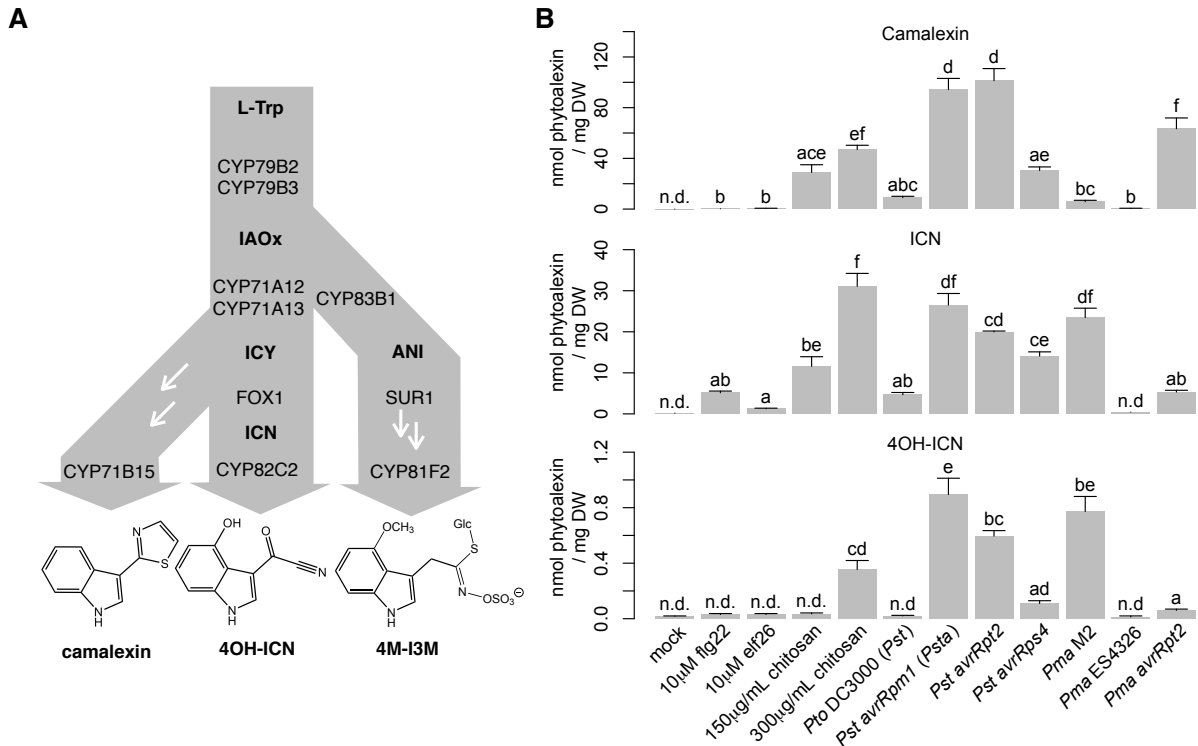

81  
 82 **Figure 1. 4OH-ICN is synthesized under ETI-like responses.** (a). Schematic of  
 83 tryptophan (L-Trp)-derived specialized metabolism in *A. thaliana*. White arrows denote  
 84 the presence of additional enzymes. ICY, indole cyanohydrin; ANI, *aci*-nitro indole. (b).  
 85 LC-DAD-FLD-MS analysis of camalexin (top), ICN (middle), and 4OH-ICN (bottom) in  
 86 seedlings elicited with indicated MAMPs and bacterial strains for 27 hr. Data represent  
 87 mean  $\pm$  SE of 3-4 biological replicates. Different letters denote statistically significant  
 88 differences ( $P < 0.05$ , one-factor ANOVA coupled to Tukey's test). ICA-ME and 4OH-  
 89 ICA-ME are methanolic degradation products of ICN and 4OH-ICN, respectively. 4OH-  
 90 ICA is an aqueous degradation product of 4OH-ICN.

91 The TF WRKY33 has been shown to regulate the pathogen-inducible biosynthesis of  
92 camalexin in *A. thaliana* and its orthologs regulate numerous unrelated specialized  
93 metabolites in other flowering plant lineages (Qiu *et al.*, 2005; Liu *et al.*, 2015;  
94 Birkenbihl *et al.*, 2017; Schluttenhofer & Yuan, 2015). The group I class of WRKYs to  
95 which WRKY33 belongs is an ancient clade of regulators; orthologs in the green alga  
96 *Chlamydomonas reinhardtii* may be ancestral to all higher plant WRKYs (Rinerson *et*  
97 *al.*, 2015; Schluttenhofer & Yuan, 2015). While all WRKY TFs bind to the W-box core  
98 sequence [TTGAC(T/C)], WRKY33 preferentially binds W-boxes that are within 500 nt  
99 of the 'WRKY33-specific' motif [(T/G)TTGAAT] (Rushton *et al.*, 2010; Liu *et al.*, 2015).

100

101 Here, we show that a recent, lineage-specific TE exaptation resulted in the expansion  
102 of a core regulon within the framework of Arabidopsis Trp-derived defense  
103 metabolism. Specifically, the LINE retrotransposon *EPCOT3* retroduplicated from a  
104 WRKY33-TFBS-carrying progenitor and inserted upstream of the newly duplicated  
105 gene *CYP82C2*. Subsequent chromatin remodeling in *A. thaliana* lead *EPCOT3* to  
106 become a *bona fide* enhancer with demonstrated biochemical, regulatory,  
107 physiological, and fitness-promoting by way of WRKY33-binding, pathogen-responsive  
108 *CYP82C2* transcription, 4OH-ICN biosynthesis, and antibacterial defense.

109

## 110 **Results**

111 **4OH-ICN requires ETI-like responses.** To identify the major Trp-derived specialized  
112 metabolites synthesized in ETI in *A. thaliana*, we compared host transcriptional and  
113 metabolic responses to the PTI-eliciting bacterial MAMPs flg22, elf26, and fungal

114 MAMP chitosan, the PTI/ETS-eliciting pathogens *Pseudomonas syringae* pv. *tomato*  
115 DC3000 (*Pto* DC3000 or *Pst*), *Pseudomonas syringae* pv. *maculicola* ES4326 (*Pma*) and  
116 the ETI-eliciting pathogens *Pst avrRpm1* (*Psta*), *Pst avrRpt2*, *Pst avrRps4*, *Pma* M2, and  
117 *Pma avrRpt2* under similar conditions as those of previous studies (Denoux *et al.*,  
118 2008; Clay *et al.*, 2009). *Psm* M2 is an ETI-eliciting strain from which the *avrRpm1* gene  
119 was originally isolated (Debener *et al.*, 1991). Both *flg22* and *Psta* induced genes  
120 involved in 4OH-ICN, camalexin and 4M-I3M biosynthesis, with 4OH-ICN and  
121 camalexin biosynthetic genes having a higher level of induction than those of 4M-I3M  
122 in *Psta*-inoculated plants (Supplementary Fig. 1a; Denoux *et al.*, 2008). In contrast to  
123 the quantitative differences observed in transcriptional responses between PTI and ETI  
124 (Tao *et al.*, 2003; Navarro *et al.*, 2004), the metabolite responses between PTI and ETI  
125 differed largely qualitatively. 4OH-I3M and 4M-I3M were present in uninfected plants  
126 and accumulated to modest levels at the expense of parent metabolite I3M in *flg22*-  
127 and *Psta*-inoculated plants (Supplementary Fig. 1b) (Clay *et al.*, 2009). By comparison,  
128 ICN, 4OH-ICN, and camalexin were absent in uninfected plants and at low-to-  
129 undetectable levels in plants treated with saturating concentrations of the bacterial  
130 MAMPs *flg22* and *elf26* (10  $\mu$ M; Felix *et al.*, 1999; Zipfel *et al.*, 2006). In contrast, ICN,  
131 4OH-ICN and camalexin accumulated to high levels upon inoculation with ETI-inducing  
132 pathogens (Fig. 1b; Supplementary Fig. 1c). Furthermore, camalexin, ICN, and 4OH-  
133 ICN metabolism was greatly diminished, and indole glucosinolate levels were mostly  
134 unchanged in the *rpm1* mutant, which is impaired in ETI recognition of *Psta* (Bisgrove  
135 *et al.*, 1994) (Supplementary Fig. 1b-c). By contrast, camalexin and ICN were absent in  
136 uninfected plants and largely at low-to-undetectable levels in plants treated with

137 MAMPs and PTI/ETS-eliciting pathogens, with 4OH-ICN not detected in most cases.

138 One exception was the fungal MAMP chitosan. 150 µg/mL chitosan induced high levels

139 of camalexin and detectable levels of ICN, consistent with previous observations of

140 camalexin biosynthetic genes upregulation (Fig. 1b) (Povero *et al.*, 2011). Higher

141 chitosan concentrations ( $\geq 200$  µg/mL) have been shown to induce HR-like cell death in

142 *Arabidopsis* (Cabrera *et al.*, 2006), a phenomenon commonly observed for ETI (Jones

143 and Dangl, 2006). To our surprise, 300 µg/mL chitosan additionally induced detectable

144 levels of 4OH-ICN (Fig. 1b). These results suggest that 4OH-I3M, 4M-I3M, camalexin,

145 and ICN are synthesized in response to multiple PTI elicitors, whereas 4OH-ICN

146 biosynthesis is specific to ETI-like responses.

147

148 ***WRKY33* is required to activate 4OH-ICN in response to *Psta*.** 4OH-ICN

149 biosynthetic genes are highly co-expressed with each other (Rajniak *et al.*, 2015) and

150 with camalexin biosynthetic genes (Supplementary Fig. 1d), which are in the *WRKY33*

151 regulon (Qiu *et al.*, 2008; Birkenbihl *et al.*, 2012). To determine whether 4OH-ICN

152 biosynthetic genes are also in the *WRKY33* regulon, we compared camalexin, ICN and

153 4OH-ICN levels between wild-type and a *wrky33* loss-of-function mutant that encodes

154 two differently truncated proteins (Fig. 2a; Zheng *et al.*, 2006). Consistent with a

155 previous report (Qiu *et al.*, 2008), *wrky33* was impaired in camalexin biosynthesis in

156 response to *Psta* and *Pst avrRps4* (Fig. 2b; Supplementary Fig. 2a). The *wrky33* mutant

157 was similarly impaired in 4OH-ICN biosynthesis (Fig. 2b; Supplementary Fig. 2a). These



158 results indicate that WRKY33 is required for camalexin and 4OH-ICN biosynthesis in  
159 response to multiple ETI elicitors.

160

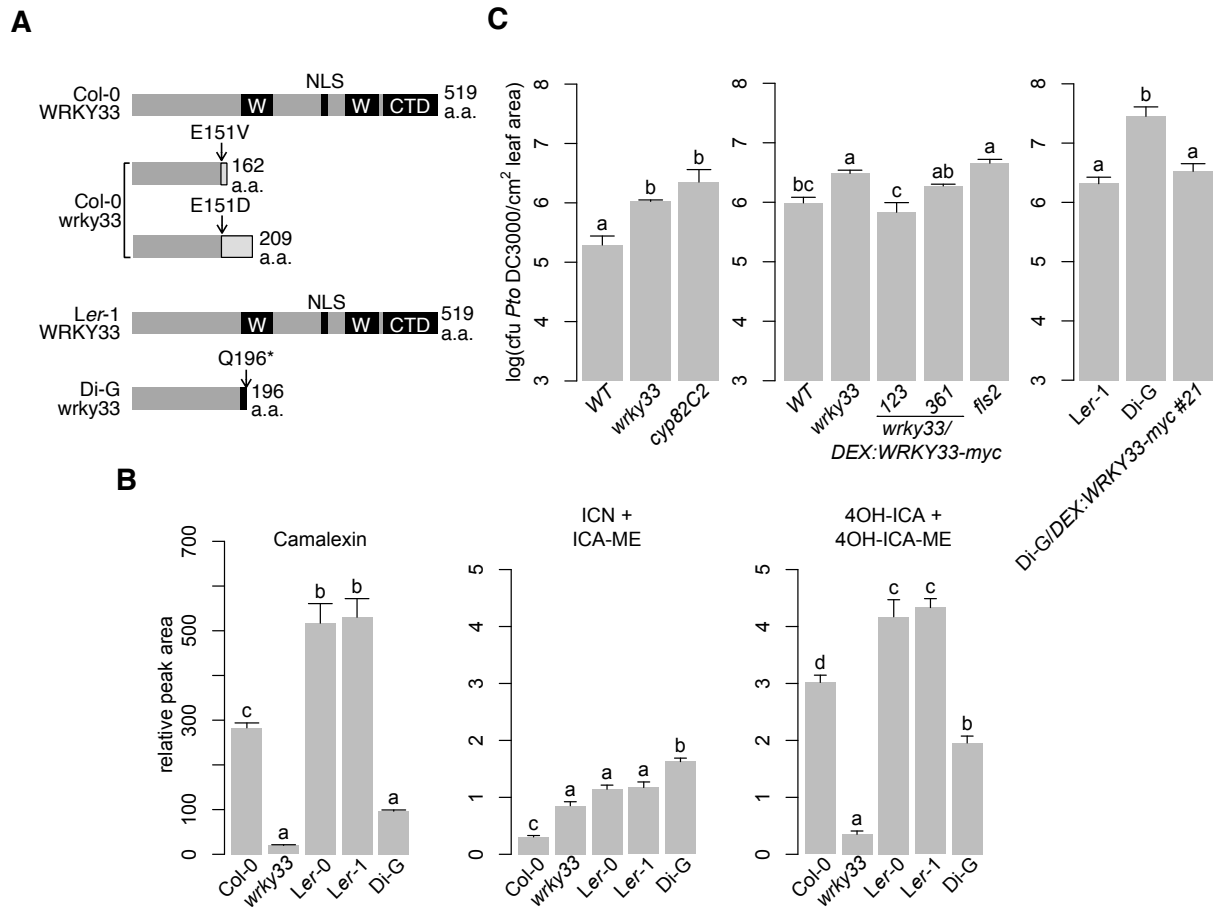

161

162 **Figure 2. Intraspecific variation in *WRKY33* affects 4OH-ICN and immunity. (a)**

163 Schematic of *WRKY33* proteins in Col-0, Col-0 *wrky33*, Ler-1 and Di-G. Black boxes

164 denote *WRKY* domains (W), nuclear localization signal (NLS), or C-terminal domain

165 (CTD). (b) LC-DAD-MS analysis of camalexin, ICN, and 4OH-ICN in seedlings

166 inoculated with *Psta* for 24 hr. Data represent mean  $\pm$  SE of four replicates. (c)

167 Bacterial growth analysis of *Pst* in surface-inoculated leaves. Middle and right panels

168 were pre-treated with 20  $\mu$ M dex for 6-8 hr. Data represent mean  $\pm$  SE of 4 (left), 6-11

169 (middle), and 6-8 (right) biological replicates. CFU, colony-forming units. Different

170 letters in (b-c) denote statistically significant differences ( $P < 0.05$ , one-factor ANOVA)

171 coupled to Tukey's test). Experiments in **(b-c)** were performed at least twice, producing  
172 similar results.

173

174

175

176 To confirm that *WRKY33* is required to activate the 4OH-ICN pathway, we used a two-  
177 component glucocorticoid-inducible system to generate *wrky33* plants that in the  
178 presence of the glucocorticoid hormone dexamethasone (dex) express a wild-type  
179 copy of *WRKY33* with a C-terminal fusion to 1x flag epitope (*wrky33/DEX:WRKY33-*  
180 *flag*; Supplementary Fig. 2b-c). Induced expression of *WRKY33-flag* restored  
181 camalexin and 4OH-ICN biosynthesis in *Psta*-challenged *wrky33* plants to greater than  
182 wild-type levels (Supplementary Fig. 2d). These results indicate that *WRKY33* is  
183 required to activate camalexin and 4OH-ICN biosynthesis in response to *Psta*.

184

185 **Intraspecific variation in *WRKY33* affects 4OH-ICN synthesis and pathogen**  
186 **defense.** Intraspecific variation in TFs can contribute to gain or loss of phenotypes,  
187 such as branching in maize (Studer *et al.*, 2011) or pelvic loss in three-spined  
188 stickleback fish (Chan *et al.*, 2010). In addition, the wide variation in camalexin  
189 biosynthesis reported among natural accessions of *A. thaliana* (Kagan &  
190 Hammerschmidt, 2002) suggests that a similar variation in 4OH-ICN biosynthesis may  
191 exist. To identify additional transcriptional activators of 4OH-ICN biosynthesis that  
192 otherwise might be refractory to traditional genetic approaches, we compared  
193 intraspecific variation in *Psta*-induced camalexin, ICN and 4OH-ICN among 35 re-  
194 sequenced accessions and *wrky33* (Col-0 accession). We found camalexin and 4OH-  
195 ICN levels to be positively correlated among accessions ( $R^2 = 0.37$ ; Supplementary Fig.  
196 3a), lending further support to their co-regulation by *WRKY33*. Accession Dijon-G (Di-  
197 G) was identified to produce less camalexin and 4OH-ICN and more ICN than its near-  
198 isogenic relatives, the Landsberg accessions *Ler-0* and *Ler-1* (Fig. 2b; Supplementary

199 Fig. 3a-b). In addition, differences observed in the metabolite response between  
200 Landsberg accessions and Di-G most closely resembled those between Col-0 and  
201 *wrky33* mutant (Fig. 2b; Supplementary Fig. 3a). These results led us to hypothesize  
202 that genetic variation in a regulatory gene, as opposed to an immune signaling gene, is  
203 responsible for the metabolite phenotypes observed in Di-G. To test this hypothesis,  
204 genetic variation between Di-G and three sequenced Landsberg accessions (La-0, *Ler*-  
205 0, and *Ler*-1) were used to identify 354 genes that were differentially mutated to high  
206 effect in Di-G (Supplementary Fig. 3c). Twenty-eight of these mutated Di-G genes were  
207 annotated by Gene Ontology to have roles in defense, including *WRKY33*  
208 (Supplementary Table 1). We confirmed by Sanger sequencing that Di-G *WRKY33*  
209 harbors a nonsense mutation early in the N-terminal DNA-binding motif (Fig. 2a), likely  
210 abolishing protein function. Our findings indicate that camalexin and 4OH-ICN are  
211 sensitive to intraspecific variation in *WRKY33*.

212  
213 Camalexin and 4OH-ICN promote plant fitness by contributing non-redundantly to  
214 pathogen defense against the fitness-reducing *Pst* (Kover & Scaal, 2002; Rajniak *et al.*,  
215 2015). To confirm that disease resistance to *Pst* is also sensitive to intraspecific  
216 variation in *WRKY33*, we measured bacterial growth in adult leaves of *wrky33* and Di-G  
217 and their respective (near-)isogenic accessions Col-0 and *Ler*-1. *wrky33* and Di-G were  
218 more susceptible to *Pst* than their (near)isogenic relatives and comparable to the 4OH-  
219 ICN biosynthetic mutant *cyp82C2* (Fig. 2c; Rajniak *et al.*, 2015).

220

221 We additionally generated *wrky33* plants that in the presence of dex express a wild-  
222 type copy of WRKY33 with a C-terminal fusion to a larger 6x myc epitope  
223 (*wrky33/DEX:WRKY33-myc*; Supplementary Fig. 4a-c). Induced expression of  
224 WRKY33-myc complemented *wrky33* and Di-G to Col-0 and Ler-1 levels of resistance  
225 to *Pst*, respectively (Fig. 2c). Additionally camalexin and ICN levels complemented  
226 and/or exceeded Col-0 and Ler-1 levels in *Psta*-challenged *wrky33/DEX:WRKY33-myc*  
227 and *Di-G/DEX:WRKY33-myc* plants, respectively (Supplementary Fig. 4d-e). Together,  
228 our results support a role of WRKY33 in pathogen defense as an activator of Trp-  
229 derived specialized metabolism.

230

231 **WRKY33 activates 4OH-ICN biosynthesis.** To confirm that the 4OH-ICN biosynthetic  
232 pathway is in the WRKY33 regulon, we first compared *WRKY33*, *CYP71A13*,  
233 *CYP71B15*, *FOX1* and *CYP82C2* transcript levels among WT, *wrky33*,  
234 *wrky33/DEX:WRKY33-flag*, and *wrky33/DEX:WRKY33-myc*. Consistent with previous  
235 reports (Qiu *et al.*, 2008), *CYP71A13*, *CYP71B15*, and *FOX1* expression was down-  
236 regulated in *wrky33* plants in response to *Psta* and upregulated in both  
237 *wrky33/DEX:WRKY33-flag* and *wrky33/DEX:WRKY33-myc* (Fig. 3a) (Supplementary Fig.  
238 4f, 5a). Interestingly, *CYP82C2* expression and 4OH-ICN production were restored in  
239 *wrky33/DEX:WRKY33-flag* but not *wrky33/DEX:WRKY33-myc* or *Di-G/DEX:WRKY33-*  
240 *myc* plants (Fig. 2d, 3a) (Supplementary Fig. 4d-f), likely due to the interference of the  
241 larger myc tag with the WRKY33 C-terminus, a region previously linked with  
242 transactivation activity (Zhou *et al.*, 2015). These transcriptional and metabolic findings

243 indicate that WRKY33 mediates camalexin and 4OH-ICN biosynthesis in response to  
244 pathogen effectors.

245

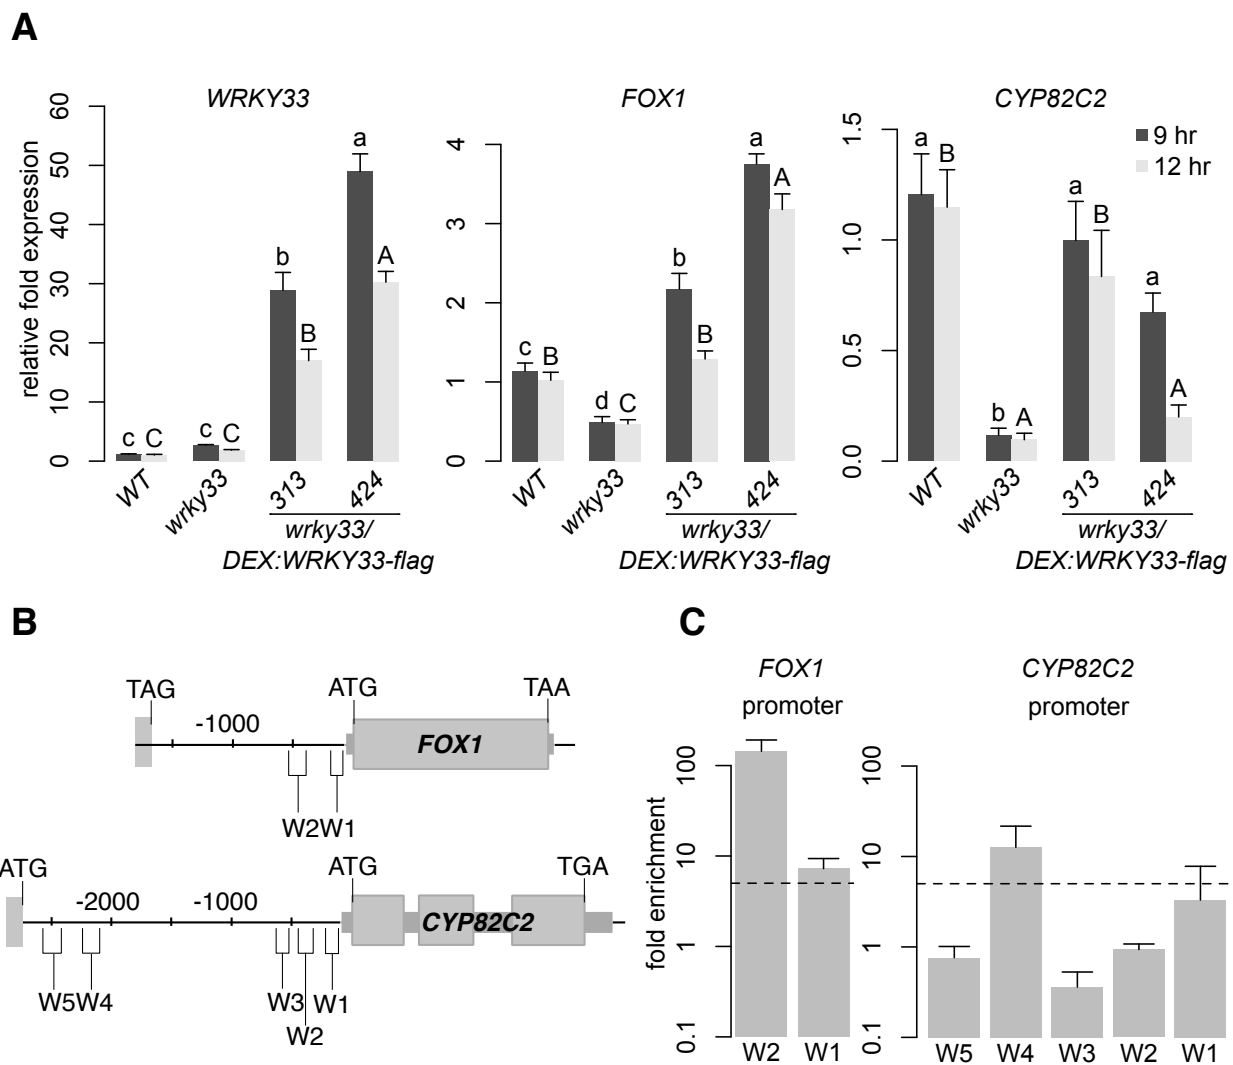

246  
 247 **Figure 3. WRKY33 directly activates 4OH-ICN biosynthetic genes. (a)** qPCR  
 248 analysis of 4OH-ICN regulatory and biosynthetic genes in seedlings inoculated with 20  
 249 μM dex and *Psta* for 9 and 12 hr. Different letters denote statistically significant  
 250 differences ( $P < 0.05$ , one-factor ANOVA coupled to Tukey's test). Lowercase and  
 251 uppercase letters denote comparisons across 9 and 12 hr timepoints, respectively.  
 252 Data represent mean  $\pm$  SE of 4-6 replicates. **(b)** Schematic of *FOX1* and *CYP82C2* loci,  
 253 indicating nt positions of W-box-containing regions (W). **(c)** ChIP-PCR analysis of W-  
 254 box-containing regions upstream of *FOX1* and *CYP82C2* in *wrky33/DEX:WRKY33-flag*



255 plants co-treated with 20  $\mu$ M dex (D) or mock solution (M) and *Psta* for 9 hr. Dashed  
256 line represents the 5-fold cutoff between weak and strong TF-DNA interactions. Data  
257 represent mean  $\pm$  SE of four replicates.

258

259 We then tested for WRKY33-binding to W-box-containing regions upstream of  
260 camalexin and 4OH-ICN biosynthetic genes in dex-treated and *Psta*-infected  
261 *wrky33/DEX:WRKY33-flag* seedlings by chromatin immunoprecipitation (ChIP)-PCR.  
262 WRKY33 has been shown to bind to a W-box region upstream of *CYP71A12*  
263 (Birkenbihl *et al.*, 2017), a region that also contains three WRKY33-specific motifs and  
264 is consistent with WRKY33's reported binding site preference (Liu *et al.*, 2015). We  
265 additionally observed that *Psta*-induced WRKY33 bound strongly (greater than 5-fold  
266 enrichment) to a single W-box region upstream of *FOX1* and *CYP82C2* (W2 and W4,  
267 respectively; Fig. 3b-c; Supplementary Fig. 5b). Both regions also contain one to three  
268 WRKY33-specific motifs. Together with our expression analysis, our findings indicate  
269 that WRKY33 uses preferred WRKY33-binding sites to directly activate 4OH-ICN  
270 biosynthetic genes in response to pathogen effectors.

271

272 Interestingly, *Psta*-induced WRKY33 did not bind to the W5 region upstream of  
273 *CYP82C2* (Fig. 3c), a W-box region that does not contain any WRKY33-specific motifs  
274 and is just upstream of neighboring gene of unknown function *At4g31960* (Fig. 3b).  
275 WRKY33 reportedly binds to W5 in response to flg22 and *B. cinerea* (Liu *et al.*, 2015;  
276 Birkenbihl *et al.*, 2017). By contrast, *Psta*-induced WRKY33 bound strongly to W1  
277 region upstream of *CYP71B15* (Supplementary Fig. 5c-d), a W-box region that also

278 does not contain any WRKY33-specific motifs. WRKY33 reportedly binds to a region  
279 encompassing W1 in response to flg22 and *Psta* (Qiu *et al.*, 2008; Birkenbihl *et al.*,  
280 2012). These findings suggest that WRKY33 may use W-box extended motifs or novel  
281 specificity motifs to target camalexin biosynthetic genes in response to pathogen  
282 effectors, or 4OH-ICN biosynthetic genes in response to MAMPs or fungal pathogens.

283

284 **CYP82C2 underwent regulatory neofunctionalization.** CYP82C2 catalyzes the last  
285 step in 4OH-ICN biosynthesis, hydroxylating ICN to form 4OH-ICN (Rajniak *et al.*,  
286 2015), and likely was the last 4OH-ICN pathway gene to be recruited to the WRKY33  
287 regulon in *A. thaliana*. To explore the phylogenetic distribution pattern of 4OH-ICN  
288 biosynthesis, we profiled ICN and 4OH-ICN metabolites in close and distant relatives  
289 of *A. thaliana* in response to *Psta*. While ICN biosynthesis was observed across  
290 multiple close relatives, 4OH-ICN was only detected in *A. thaliana* (Fig. 4a;  
291 Supplementary Fig. 6a). This result suggests that 4OH-ICN manifests a species-  
292 specific diversification of pathogen-inducible Trp-derived metabolism in the mustard  
293 family.

294

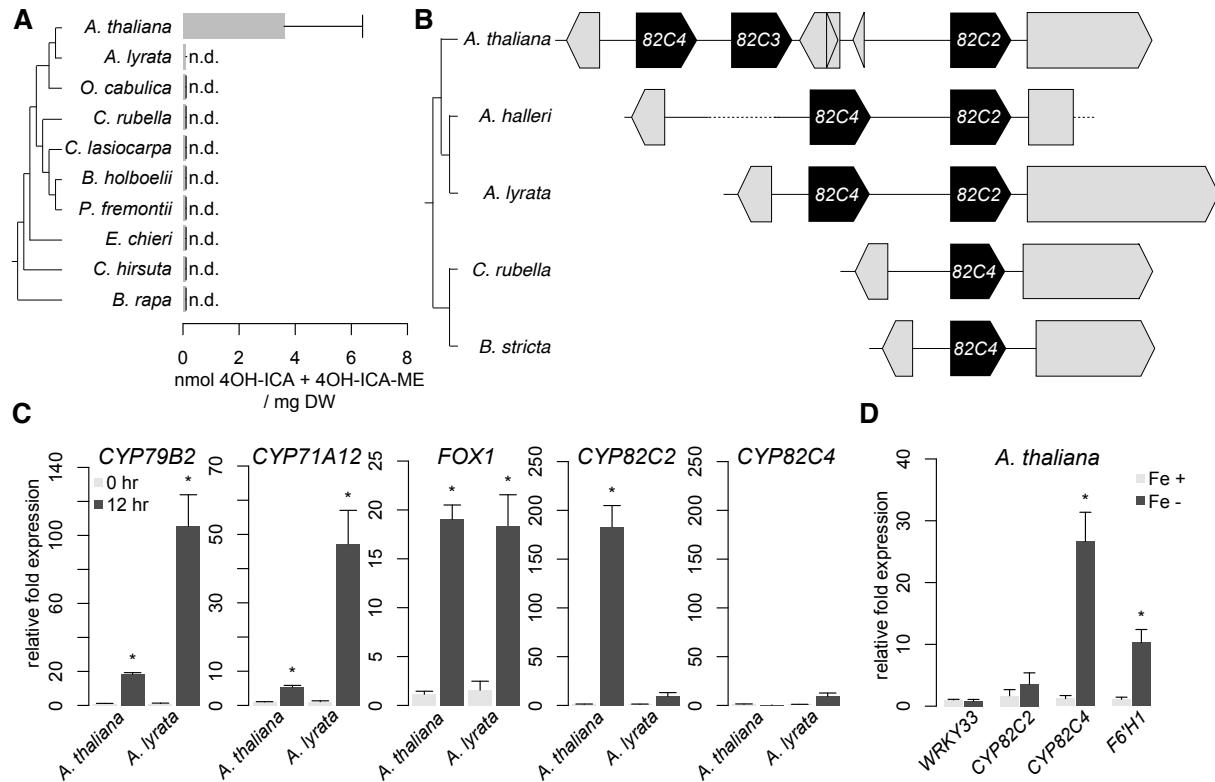

295

296 **Figure 4. Regulatory neofunctionalization of *CYP82C2*.** (a) (Left) Phylogenetic  
 297 species tree. (Right) HPLC-DAD analysis of 4OH-ICN in seedlings inoculated with *Psta*  
 298 for 30 hr. Data represent mean  $\pm$  SE of three independent experiments (n = 4 biological  
 299 replicates), each with *A. thaliana* as a positive control. 4OH-ICA and 4OH-ICA-ME are  
 300 aqueous and methanolic degradations products of 4OH-ICN, respectively. DW, dry  
 301 weight; n.d., not detected. (b) (Left) phylogenetic species tree. (Right) Synteny map of  
 302 the *CYP82C* genes. Grey arrows or rectangles represent non-*CYP82C* genes. Grey  
 303 dotted lines represent large (>500 nt) sequence gaps. (c-d) qPCR analysis of 4OH-ICN  
 304 and sideretin biosynthetic genes in seedlings inoculated with *Psta* (c) or grown in iron-  
 305 deficient medium (d). Data represents the mean  $\pm$  SE of four biological replicates.  
 306 Asterisks denote statistically significant differences of stress-treated relative to  
 307 untreated samples ( $P < 0.05$ , two-tailed t-test).

308 In *A. thaliana*, *CYP82C2* resides in a near-tandem cluster with paralogs *CYP82C3* and  
309 *CYP82C4* (Fig. 4b). We performed phylogenetic and syntenic analyses to identify  
310 putative *CYP82C2* orthologs in ICN-synthesizing species. All identified homologs are  
311 syntenic to *CYP82C2* or *CYP82C4*, and encode proteins with >88% identity to one  
312 another (Fig. 4b; Supplementary Fig. 6b-c). *CYP82C3* is present only in *A. thaliana*, and  
313 although more similar to *CYP82C2* than *CYP82C4* in sequence, it is not functionally  
314 redundant with *CYP82C2* (Fig. 4b; Supplementary Fig. 6b; Rajniak *et al.*, 2015).  
315 *CYP82C4* is required for the biosynthesis of sideretin, a widely conserved,  
316 phenylalanine-derived metabolite required for iron acquisition (Rajniak *et al.*, 2018).  
317 *CYP82C4* has syntenic orthologs in the mustard family, correlating with the distribution  
318 of sideretin biosynthesis (Fig. 4b; Supplementary Fig. 6b; Rajniak *et al.*, 2018). By  
319 contrast, *CYP82C2* has syntenic orthologs only within the *Arabidopsis* genus (Fig. 4b;  
320 Supplementary Fig. 6b). These results suggest that *CYP82C2* duplicated from  
321 *CYP82C4* prior to the formation of the *Arabidopsis* genus and then acquired a new  
322 expression pattern and/or catalytic function prior to *A. thaliana* speciation approx. 2  
323 million years later (Hu *et al.*, 2011; Hohmann *et al.*, 2015).  
324  
325 *CYP82C2* and *CYP82C4* were previously characterized to 5-hydroxylate with equal  
326 efficiency the specialized metabolite 8-methoxypsoralen, a molecule structurally  
327 reminiscent of ICN and sideretin (Kruse *et al.*, 2008). The apparent similarities in  
328 substrate specificity and catalytic function suggest that *CYP82C2* may have diverged  
329 from *CYP82C4* in expression but not protein function. To test this, we first compared  
330 the expression of *CYP82C2* and *CYP82C4* in *A. lyrata* and *A. thaliana* in response to

331 *Psta*. 4OH-ICN biosynthetic genes *CYP79B2*, *CYP71A12* and *FOX1* were upregulated  
332 in both species, consistent with the common presence of ICN (Fig. 4a and c). By  
333 contrast, *CYP82C2* levels were respectively upregulated and unchanged in *A. thaliana*  
334 and *A. lyrata*, correlating with the distribution of 4OH-ICN in these species (Fig. 4a and  
335 c). *CYP82C4* expression was unchanged in both species (Fig. 4c). These results  
336 indicate that 4OH-ICN biosynthesis is linked with pathogen-induced expression of  
337 *CYP82C2*.

338

339 We then compared the aligned upstream sequences of *CYP82C2* and *CYP82C4* in *A.*  
340 *lyrata* and *A. thaliana* and observed good sequence conservation among orthologs but  
341 poor conservation among paralogs (Supplementary Fig. 6d), indicating that sequences  
342 upstream of *CYP82C4* and *CYP82C2* were independently derived. We performed  
343 expression analysis in *A. thaliana* to confirm that *CYP82C2* and *CYP82C4* have  
344 different expression patterns. *CYP82C2* expression is upregulated in response to *Psta*  
345 and unchanged under iron deficiency (Fig. 4c-d; Supplementary Fig. 1a; Rajniak *et al.*,  
346 2015). Conversely, *CYP82C4* is upregulated under iron deficiency and unchanged in  
347 response to *Psta* (Fig. 4c-d; Murgia *et al.*, 2011; Rajniak *et al.*, 2018). Finally, *CYP82C4*  
348 was unchanged in *Psta*-challenged *wrky33* and *wrky33/DEX:WRKY33-flag*  
349 (Supplementary Fig. 6e). Our findings suggest that *CYP82C2* diverged from *CYP82C4*  
350 by acquiring WRKY33 regulation for its pathogen-induced expression.

351

352 We next assessed dN/dS ratios along branches of the CYP82C phylogenetic tree  
353 (Supplementary Fig. 6b) and found good support for purifying selection acting on

354 CYP82C enzymes ( $\omega=0.21$ ), and no support for positive selection acting on  
355 CYP82C2/3 enzymes (Supplementary Table 2). Lastly, we identified non-conserved  
356 amino acid residues among CYP82C homologs and mapped this information onto a  
357 homology model of CYP82C2. The protein inner core, which encompasses the active  
358 site and substrate channel, is highly conserved among CYP82C homologs  
359 (Supplementary Fig. 6f), and is consistent with CYP82C2 and CYP82C4's reportedly  
360 redundant catalytic functions (Kruse *et al.*, 2008). Altogether, our findings suggest that  
361 CYP82C2 underwent regulatory neofunctionalization (Moore & Purugganan, 2005),  
362 diverging from CYP82C4 in expression but not protein function.

363

364 **TE EPCOT3 is a CYP82C2 enhancer.** WRKY33 regulation of CYP82C2 is mediated by  
365 a WRKY33-TFBS in the W4 region (Figs. 3 and 5a; Supplementary Fig. 5c). Preferential  
366 WRKY33-binding at this region should also be influenced by chromatin features  
367 associated with *cis*-regulatory elements like enhancers and basal promoters (Slattery  
368 *et al.*, 2014). To investigate how CYP82C2 acquired WRKY33-binding for its pathogen-  
369 induced expression, we compared the aligned upstream sequences of CYP82C  
370 homologs in ICN-synthesizing species. We observed three large upstream sequences  
371 specific to *A. thaliana* CYP82C2, hereafter named ***Eighty-two-C2 Promoter Contained***  
372 ***Only in A. Thaliana1-3 (EPCOT1-3)*** (Fig. 5a). EPCOT3 in particular is a 240nt region that  
373 completely encompasses W4 (Fig. 5a), indicating that the WRKY33's regulation of  
374 CYP82C2 in response to *Psta* may be species-specific. Further bioinformatics analysis  
375 revealed that EPCOT3 has the epigenetic signature of an active enhancer (Roudier *et*  
376 *al.*, 2011; Liu *et al.*, 2018). Relative to neighboring sequences, EPCOT3 is enriched with

377 activating histone mark H3K4me2 and lacks the repressive histone mark H3K27me3  
378 (Fig. 5b) (Heintzman *et al.*, 2007; Hoffman *et al.*, 2010; Roudier *et al.*, 2011; Bonn *et al.*,  
379 2012; Wang *et al.*, 2014). Our findings suggest that *EPCOT3* functions as an enhancer  
380 that mediates WRKY33-binding and activation of *CYP82C2* in response to pathogen  
381 effectors.  
382

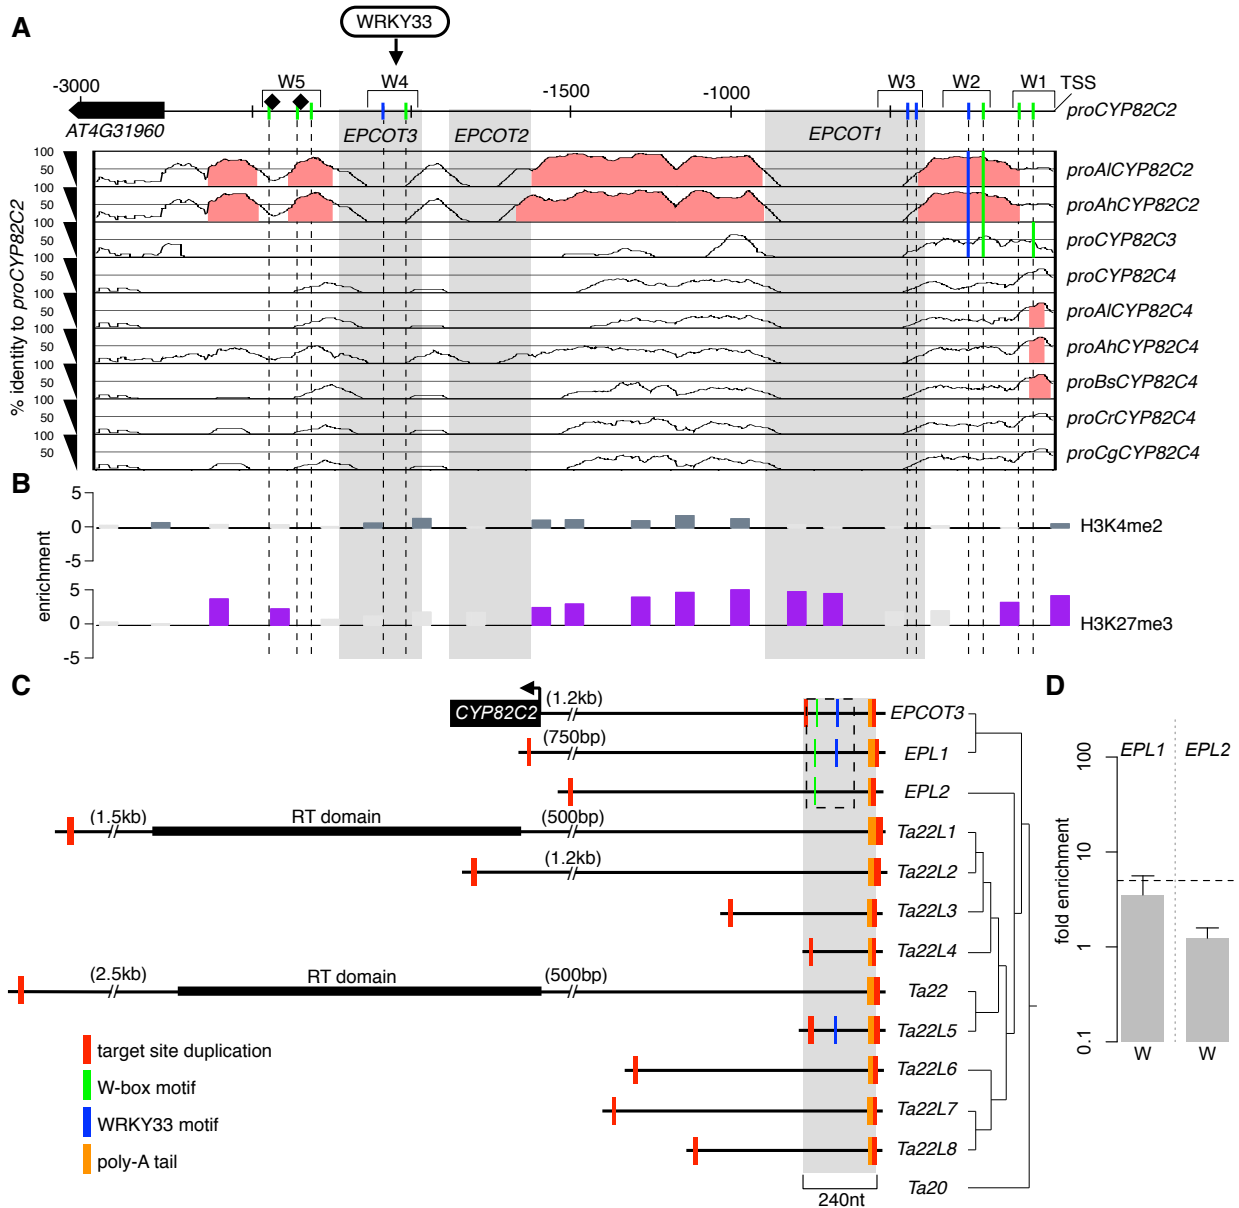

383

384 **Figure 5. TE *EPCOT3* is a *CYP82C2* enhancer. (a) mVISTA plot of *CYP82C2***

385 upstream sequence, indicating nt positions of unique (*EPCOT1–3*; gray boxes) and

386 conserved regions ( $\geq 70\%$  sequence identity; pink) among homologous sequences. Also

387 indicated are positions of W-boxes (green) and WRKY33-specific motifs (blue) that are

388 present (solid lines) or absent (dashed lines) in each homologous sequence, previously

389 known WRKY33-TFBSs (diamonds) and CHIP-tested regions (W1-5). TSS,



390 transcriptional start site; *Al*, *Arabidopsis lyrata*; *Ah*, *Arabidopsis halleri*; *Cr*, *Capsella*  
391 *rubella*; *Bs*, *Boechera stricta*; *Cg*, *Capsella grandiflora*. **(b)** Epigenetic map of *CYP82C2*  
392 upstream sequence, indicating nt positions of significant amounts of H3K4me2 (blue-  
393 gray bars), and H3K27me3 (purple bars). **(c)** (Left) Schematic of *EPCOT3* and related  
394 LINE retrotransposons in *A. thaliana* drawn to scale, indicating nt positions of  
395 *CYP82C2* and reverse transcriptase (RT) domain. A more detailed tree is available as  
396 Supplementary Text 1. (Right) Phylogenetic maximum likelihood tree. Dashed box  
397 represent region containing W-boxes (green lines) and/or WRKY33-binding motifs (blue  
398 lines) within *EPCOT3*, *EPL1* and *EPL2*. **(d)** ChIP-PCR analysis of W-box-containing  
399 regions (W) within *EPL1* and *EPL2* in *wrky33/DEX:WRKY33-flag* plants co-treated with  
400 20  $\mu$ M dex (D) or mock solution (M) and *Psta* for 9 hr. Data represent mean  $\pm$  SE of four  
401 replicates. Dashed line represents the 5-fold cutoff between weak and strong TF-DNA  
402 interactions.  
403

404 *EPCOT3* contains a 3' poly-A tail and is flanked by variable-length target site  
405 duplications (Fig. 5c; Supplementary Fig. 7a), which are hallmarks of eukaryotic LINE  
406 retrotransposons (Malik *et al.*, 1999). LINE retrotransposition (reverse transcription and  
407 integration) results in frequent 5'-truncation of retrocopies (Luan *et al.*, 1993). We  
408 identified eleven variably truncated retrocopies similar to *EPCOT3* throughout the  
409 genome, including *Ta22*, one of the first LINES characterized in *A. thaliana* (Fig. 5c;  
410 Supplementary Fig. 7a-b, Supplementary Table 3; Wright *et al.*, 1996). *EPCOT3*-related  
411 LINES were sorted into two groups roughly correspondent to their phylogenetic  
412 placement: *EPCOT3-LIKE (EPL)* for those with high identity (>65%) to *EPCOT3* and  
413 *Ta22* or *Ta22-LIKE (Ta22L)* for the remainder (Supplementary Fig. 7a; Supplementary  
414 Table 3). Only *Ta22* and *Ta22L1* are full-length LINES (Fig. 5c), presumably encoding  
415 the proteins necessary for their own transposition and for the transposition of  
416 nonautonomous family members like *EPCOT3*. We also identified two syntenic  
417 species-specific *Ta22Ls*, but no *EPLs*, in *A. lyrata* (Supplementary Table 3). Given the  
418 80% overall sequence identity between *A. thaliana* and *A. lyrata* (Hu *et al.*, 2011), this  
419 data indicates that *EPCOT3* and *EPLs* arose from retrotransposition following the  
420 speciation of *A. thaliana*.

421  
422 Of all the retrocopies, *EPL1* is most similar to *EPCOT3* (85.4% identity), sharing the W-  
423 box and WRKY33-specific motif, whereas *EPL2* is less similar (67%) and lacks the  
424 WRKY33-specific motif (Fig. 5c; Supplementary Table 3, Supplementary Fig. 7a). *EPL1*  
425 and *EPL2* are much less truncated than *EPCOT3* (Fig. 5c), and lack epigenetic  
426 signatures typical of *cis*-regulatory sequences (Supplementary Fig. 7c) (Roudier *et al.*,

427 2011; Liu *et al.*, 2018). To investigate whether the sequence information and chromatin  
428 features associated with *EPLs* are sufficient for WRKY33-binding, we tested for  
429 WRKY33-binding to *EPL* sequences homologous to the W4 region of *EPCOT3* in dex-  
430 treated, *Psta*-infected *wrky33/DEX:WRKY33-flag* plants by CHIP-(q)PCR. Compared to  
431 *EPCOT3* (Fig. 3c), WRKY33 respectively bound weakly or not at all to *EPL1* and *EPL2*  
432 (Fig. 5d; Supplementary Fig. 7d). Our findings suggest the following history: (1) *EPL1*  
433 likely retroduplicated from *EPL2* or its progenitor, which already contained a W-box; (2)  
434 *EPL1* then acquired a WRKY33-specific motif by mutation; (3) *EPCOT3* retroduplicated  
435 from *EPL1* and then acquired epigenetic signatures of an enhancer, thereby allowing  
436 selection to act on standing variation rather than *de novo* mutation for *CYP82C2*  
437 recruitment into the 4OH-ICN biosynthetic pathway.

438

## 439 **Discussion**

440 TEs were originally conceived to act as “controlling elements” of several loci in the  
441 genome (McClintock, 1956), and exaptation of TEs into *cis*-regulatory modules has  
442 been hypothesized to be responsible for the rapid transcriptional rewiring in more  
443 ancient lineages of vertebrates (Feschotte 2008; Bourque 2009; de Souza *et al.*, 2013).  
444 However, few (if any) evolutionarily recent TE exaptation events in vertebrates and  
445 higher plants have been demonstrated to have biochemical, regulatory, physiological  
446 and fitness-promoting functions (de Souza *et al.*, 2013). With well over a dozen  
447 genomes available including the genetic model *A. thaliana*, the mustard family presents  
448 an excellent system for examining such events. In this study, we show that *EPCOT3* is  
449 a TE-derived enhancer that mediates WRKY33-binding, pathogen-responsive

450 transcription of *CYP82C2*, synthesis of the species-specific metabolite 4OH-ICN, and  
451 pathogen defense (Fig. 6). These results provide the first instance of a recent TE  
452 exaptation responsible for the rewiring of a new gene into an ancient regulon,  
453 ultimately leading to a positive effect on fitness.  
454

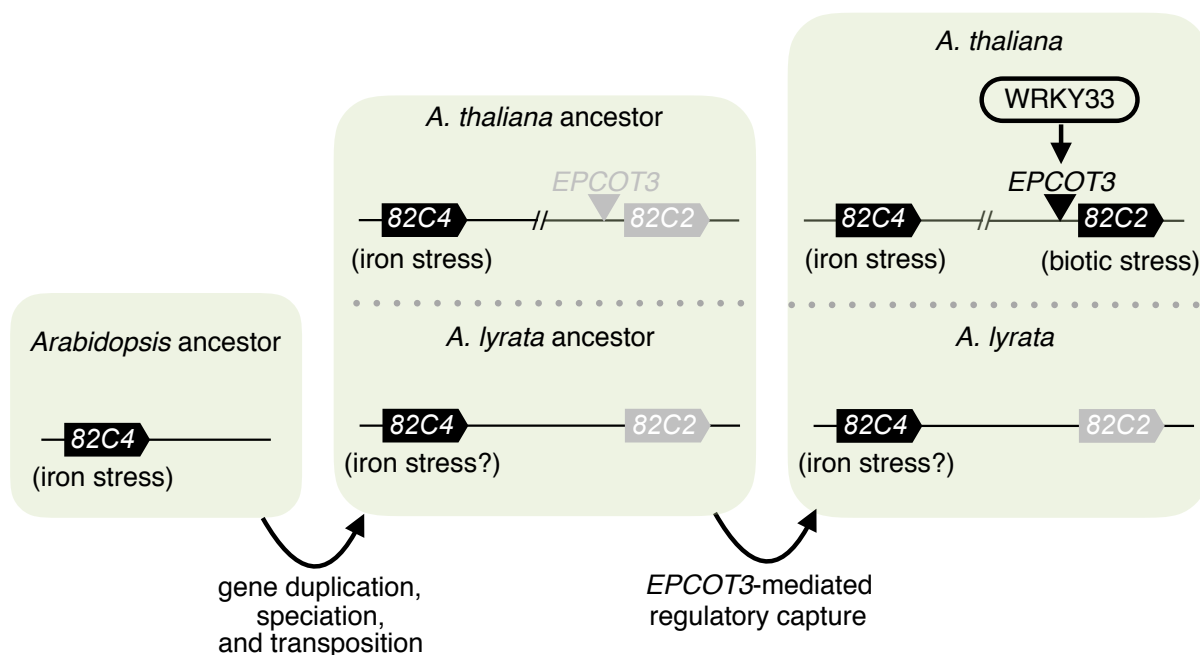

455

456 **Figure 6. Model of regulatory neofunctionalization of *CYP82C2*.**

457 Although the *EPL1/EPCOT3* progenitor retrotransposed a preferred WRKY33-TFBS in  
458 the form of *EPCOT3* upstream of *CYP82C2*, a further series of epigenetic modifications  
459 were needed to facilitate optimal access of *EPCOT3* by WRKY33 (Fig. 6). *EPL1* exists  
460 in a silenced heterochromatin state (Supplementary Fig. 7c), typical for TEs (Slotkin &  
461 Martienssen, 2007), and is bound weakly by WRKY33 (Fig. 5d), whereas *EPCOT3* is in  
462 an open chromatin state (Fig. 5b; Roudier *et al.*, 2011; Liu *et al.*, 2018) and bound  
463 strongly by WRKY33 (Fig. 3c). The more severe 5'-truncation of *EPCOT3* could  
464 account for its release from TE silencing mechanisms, and the initially weak WRKY33-  
465 binding could provide a 'seed' for chromatin remodelers to drive the exaptation of  
466 newly retrotransposed *EPCOT3* into a *bona fide* enhancer. Further epigenomic  
467 sampling within *Arabidopsis* is needed to better clarify the epigenetic transformations  
468 underlying the *EPCOT3* exaptation event.

469  
470 Compared to closely-related Landsberg accessions (Supplementary Fig. 3; Hardtke *et*  
471 *al.*, 1996), Di-G synthesizes less camalexin and 4OH-ICN (Fig. 2b; Kagan &  
472 Hammerschmidt, 2002), is more susceptible to a range of bacterial and fungal  
473 pathogens (Fig. 2c) (Hugouvieux *et al.*, 1998; Kagan & Hammerschmidt, 2002;  
474 Mukherjee *et al.*, 2009), and is more sensitive to the phytohormone ethylene (Chatfield  
475 *et al.*, 2008). WRKY33 has been implicated in camalexin biosynthesis (Qiu *et al.*, 2008),  
476 antifungal defense (Zheng *et al.*, 2006), and ethylene biosynthesis (Li *et al.*, 2012). We  
477 identified WRKY33 as causal for some if not all of these phenotypes in Di-G. This is the  
478 first report of WRKY33's involvement in antibacterial defense and is consistent with the

479 contribution of camalexin and 4OH-ICN towards antibacterial defense (Rajniak *et al.*,  
480 2015).  
481  
482 WRKY33 is an ancient transcription factor responsible for many fitness-promoting  
483 traits in plants, thus it is unexpected that an *A. thaliana* accession would have a  
484 naturally occurring *wrky33* mutation (C536T transversion). Di-G is the sole member of  
485 1,135 sequenced accessions to have a high-effect single nucleotide polymorphism  
486 (SNP) in *WRKY33* (1001 Genomes Consortium, 2016). Di-G and *Ler-0* have long been  
487 models for studies in mutagenesis (Rédei, 1962, Müller, 1966), and thus a possibility  
488 exists that Di-G may have originated from an ethyl methanesulfonate (EMS)  
489 mutagenesis screen of *Ler-0*. Historical EMS mutagenesis experiments generated  
490 upwards of tens of thousands of mutations per cell (Müller 1966; Rédei & Koncz, 1993;  
491 Camara *et al.*, 2000), well within the range of ~25,000 SNPs that are not concordant  
492 between Di-G and *Ler-0* (Supplementary Fig. 2f). However, features of EMS mutations  
493 (i.e. transversion mutations) or X-ray mutations (i.e. indels) are not enriched in the Di-G  
494 pseudogenome relative to related pseudogenomes (Supplementary Table 4). These  
495 findings suggest that the *wrky33* Di-G mutation is naturally derived.

496

## 497 **Methods**

498 **Plant materials and growth conditions.** For qPCR and HPLC-DAD analyses, surface-  
499 sterilized *Arabidopsis thaliana* seeds were sown in 12-well microtiter plates sealed with  
500 Micropore tape (3M, St. Paul, MN), each well containing ~15 seeds and 1 mL filter-  
501 sterilized 1X Murashige and Skoog (MS; Murashige & Skoog, 1962) media (pH 5.7–5.8)

502 (4.43 g/L MS basal medium with vitamins [Phytotechnology Laboratories, Shawnee  
503 Missions, KS], 0.05% MES hydrate, 0.5% sucrose). Iron deficient media was made as  
504 previously described by Rajniak et al (2018). For *Polyctenium fremontii*, surface-  
505 sterilized seeds were sown on MS agar plates. On day 9, seedlings were transferred to  
506 6-well microtiter plates, each well containing ~15 seeds and 3 mL MS media. For all  
507 other species, surface-sterilized seeds were sown in 6-well plates, each well containing  
508 ~15 seeds and 3 mL MS media. On day 9, media were refreshed prior to bacterial  
509 elicitation. Microtiter plates were placed on grid-like shelves over water trays on a  
510 Floralight cart (Toronto, Canada), and plants were grown at 21°C with 60% humidity  
511 under a 16-hr light cycle (70-80  $\mu\text{E m}^{-2} \text{s}^{-1}$  light intensity). For chromatin  
512 immunoprecipitation analyses, approximately 200 seeds were sown in a 100mm x  
513 15mm petri plate containing 20mL of 1X MS media. Media were exchanged for fresh  
514 media on day 9. Microtiter plates were placed on grid-like shelves over water trays on  
515 a Floralight cart (Toronto, Canada), and plants were grown at 21°C with 60% humidity  
516 under a 16-hr light cycle (70-80  $\mu\text{E m}^{-2} \text{s}^{-1}$  light intensity). For bacterial infection  
517 assays, seedlings were transferred to and grown on soil [3:1 mix of Farfard Growing  
518 Mix 2 (Sun Gro Horticulture, Vancouver, Canada) to vermiculite (Scotts, Marysville,  
519 OH)] at 22°C daytime/18°C nighttime with 60% humidity under a 12-hr light cycle [50  
520 (dawn/dusk) and 100 (midday)  $\mu\text{E m}^{-2} \text{s}^{-1}$  light intensity].

521 Seed stock information is shown in Supplementary Table 5.

522

523 **Vector construction and transformation.** To generate the *DEX:WRKY33-flag*  
524 construct, *WRKY33* was PCR-amplified from genomic DNA using the primers



525 WRKY33gXhoF (5'-AACTCGAGAAGAACAAGAACCATCAC-3'), and W33flgSpeIR (5'-  
526 CGACTAGTCTACTTGTTCGTCATCGTCTTTGTAGTCGGGCATAAACGAATCGAAA-3')  
527 and subcloned into the *XhoI*/*SpeI* sites of pTA7002 vector (Aoyama and Chua, 1997;  
528 McNellis et al., 1998). To generate the *DEX:WRKY33-myc* construct, *WRKY33* was  
529 PCR-amplified using the primers WRKY33gXhoF and WRKY33gStuR (5'-  
530 AAGGCCTGGCATAAACGAATCGAAAAATG-3') and subcloned into the *XhoI*/*StuI* sites  
531 of a version of pTA7002 modified to contain 6 tandem copies of the c-Myc epitope  
532 downstream of the *StuI* site (Chezem *et al.*, 2017). The constructs were introduced into  
533 *Arabidopsis thaliana wrky33* plants via *Agrobacterium*-mediated floral dip method  
534 (Clough and Bent, 1998), and transformants were selected on agar media containing  
535 15 µg/mL hygromycin B (Invitrogen, Carlsbad, CA).

536

537 **Bacterial infection and MAMP elicitation.** A single colony of *Pseudomonas syringae*  
538 *pv. maculicola* (*Pma*) M2 (containing *avrRpm1*, but not *avrRps4* or *avrRpt2*), *Pma*  
539 ES4326 (containing no aforementioned effectors), *Pma* ES4326 *avrRpt2*, *Pseudomonas*  
540 *syringae pv. tomato* DC3000 (*Pto* DC3000 or *Pst*, containing no aforementioned  
541 effectors), *Pst avrRpm1*, *Pst avrRps4*, and *Pst avrRpt2* from a freshly streaked 3-day-  
542 old agar plate were used to inoculate 2 mL of LB containing appropriate antibiotics.  
543 Strains were grown to log phase, washed in sterile water twice, resuspended in water  
544 to OD<sub>600</sub> of 0.2, and incubated at room temperature with no agitation for 3-6 and prior  
545 to infection. Chitosan (90% deacetylated chitin; Spectrum Chemical Mfg Corp, New  
546 Brunswick, NJ) was prepared in 0.1 N acetic acid and neutralized with 0.1 N NaOH to  
547 pH 5.8 to a stock concentration of 1.2 mg/mL.

548

549 Hydroponically grown 9-day-old seedlings were inoculated with bacterial strains to  
550 OD<sub>600</sub> of 0.013 or treated with 10 μM flg22 (QRLSTGSRINSAKDDAAGLQIA; Genscript,  
551 Nanjing, China), 10 μM elf26 (ac-SKEKFERTKPHVNVGTIGHVDHGKTT; Genscript), and  
552 150 or 300 μg/mL chitosan.

553

554 For qPCR analyses, seedlings were snap-frozen in liquid nitrogen 12 hr post-infection.  
555 For HPLC-DAD analyses, seedlings were snap-frozen 24 to 28 hr post-infection. For  
556 ChIP analyses, seedlings were snap-frozen 9 hr post-infection.

557

558 4-to-5-week-old adult leaves were treated with 0.0125% Silwet or 0.0125% Silwet and  
559 20 μM dexamethasone for 20 sec and incubated on 0.8% (w/v) tissue-culture agar  
560 plates on a light cart at 21°C for 6-8 hr. Leaves were then surface-inoculated with *Pto*  
561 DC3000 (OD<sub>600</sub> = 0.002 or 10<sup>6</sup> colony-forming units (cfu)/cm<sup>2</sup> leaf area) in the presence  
562 of 0.01% (v/v) Silwet L-77 (Phytotechnology Laboratories) for 15 sec and incubated on  
563 0.8% (w/v) tissue-culture agar plates at 21°C under a 16-hr light cycle (70-80 μE m<sup>-2</sup> s<sup>-1</sup>  
564 1 light intensity) for 3 days. Leaves were then surface-sterilized in 70% ethanol for 10  
565 sec, rinsed in sterile water, surface-dried on paper towels, and the bacteria were  
566 extracted into water, using an 8-mm stainless steel bead and a ball mill (20 Hz for 3  
567 min). Serial dilutions of the extracted bacteria were plated on LB agar plates for  
568 colony-forming units (CFU) counting.

569

570 **RNA isolation and quantitative PCR (qPCR).** Total RNA was extracted from 9-day-  
571 old seedlings using TRIzol reagent (Invitrogen, San Diego, CA) according to the  
572 manufacturer's instructions. 2.5 µg of total RNA was reverse-transcribed with 3.75 µM  
573 random hexamers (Qiagen, Hilden, Germany) and 20 U of ProtoScript II (New England  
574 Biolabs, Boston, MA) according to the manufacturer's instructions. The resulting  
575 cDNA:RNA hybrids were treated with 10 U of DNase I (Roche, Basel, Switzerland) for  
576 30 min at 37°C and purified on PCR clean-up column (Macherey-Nagel, Düren,  
577 Germany). qPCR was performed with Kapa SYBR Fast qPCR master mix (Kapa  
578 Biosystems, Wilmington, MA) and CFX384 real-time PCR machine (Bio-Rad, Hercules,  
579 CA). The thermal cycling program was as follows: 95°C for 3 min; 45 cycles of 95°C for  
580 15 sec and 53°C for 30 sec; a cycle of 95°C for 1 min, 53°C for 1 min, and 70°C for 10  
581 sec; and 50 cycles of 0.5°C increments for 10 sec. Biological and technical replicates  
582 were performed on the same 384-well PCR plate. Average of the three Ct values per  
583 biological replicate was converted to difference in Ct value relative to that of control  
584 sample. The Pfaffl method (Pfaffl, 2001) and calculated primer efficiencies were used to  
585 determine the relative fold increase of the target gene transcript over the *EIF4A1*  
586 (*AT3G13920* or *AL3G26100*) housekeeping gene transcript for each biological  
587 replicate. Expression values were then calculated relative to WT un-treated samples.  
588 Primer sequences and efficiencies are listed in Supplementary Table 6.

589

590 **Camalexin and 4OH-ICN extraction and LC-DAD-MS.** 10-day-old seedlings were  
591 snap-frozen, lyophilized, weighed and homogenized using a 5-mm stainless steel bead  
592 and ball mill (20 Hz, 4 min). For phytoalexin analysis, homogenate was extracted with

593 300  $\mu$ L 80% (v/v) aqueous methanol containing 0.08% (v/v) formate and 2.5  $\mu$ L internal  
594 standard (200  $\mu$ M 4-methoxyindole/4M-I [Sigma-Aldrich] in 100% methanol) per mg  
595 sample dry weight. Extracts were sonicated for 5 min and centrifuged at 16,000xg for 2  
596 min. The supernatant was filtered using a 0.45- $\mu$ m polypropylene filter plate (GE  
597 Healthcare, Chicago, IL). Samples were separated by reversed-phase chromatography  
598 on an Ultimate 3000 HPLC (Dionex, Sunnyvale, CA) system, using a 3.5- $\mu$ m, 3x150-  
599 mm Zorbax SB-Aq column (Agilent, Santa Clara, CA); volume injected was 10  $\mu$ L. The  
600 gradient is shown in Supplementary Table 7. A coupled DAD-3000RS diode array  
601 detector (Dionex) collected UV absorption spectra in the range of 190-560 nm, a FLD-  
602 311 fluorescence detector (Dionex) collected fluorescence data at 275 nm excitation  
603 and 350 nm emission, and a MSQPlus mass spectrometer (Dionex) collected ESI mass  
604 spectra in positive and negative ion modes in the range of 100-1000 m/z. Total ICN,  
605 4OH-ICN and camalexin amounts were quantified using standard curves of standards  
606 prepared in *cyp79B2 cyp79B3* seedling extract and integrated areas in the UV  
607 chromatographs at 260-nm for 4M-I (retention time [RT] = 7.7 min); 340-nm for ICN (RT  
608 = 11.5 min); 280-nm for ICN degradation product ICA-ME (RT = 9.5 min); and co-  
609 eluting 4OH-ICN degradation products 4OH-ICA and 4OH-ICA-ME (RT = 10.1 min);  
610 and 320 nm for camalexin (RT = 12.1 min). For Figure 1b, total camalexin amounts  
611 were quantified using integrated areas in the FLD chromatograph. For some  
612 experiments, 2.5  $\mu$ L 200  $\mu$ M indole butyric acid (IBA; RT = 10.1 min) was added per  
613 mg sample dry weight instead of 4M-I. Relative amounts of ICN, 4OH-ICN, and  
614 amounts were quantified by dividing the peak areas at m/z 169 [M-H]<sup>-</sup> (ICN), 174 [M-

615 H]- (ICA-ME), 176 [M-H]- (4OH-ICA), 190 [M-H]- (4OH-ICME), and 201 [M+H]<sup>+</sup>  
616 (camalexin), by that of IBA (m/z 202 [M-H]-).

617

618 **Glucosinolate extraction and LC-DAD-FLD-MS.** Glucosinolates were analyzed as  
619 desulfoglucosinolates as previously described by Kliebenstein *et al.* (2001) with some  
620 modifications. Briefly, a 96-well 0.45 µm PVDF filter plate (EMD Millipore, Billerica, MA)  
621 was charged with 45 mg DEAE Sephadex A25 (GE Healthcare) and 300 µL of water per  
622 well and equilibrated at room temp for 2 h. Prior to sample homogenization, the plate  
623 was centrifuged at 400xg for 1 min to remove the water. The homogenate was  
624 extracted with 500 µL 70% (v/v) aqueous methanol at 67.5°C for 10 min and  
625 centrifuged at 16,000xg for 2 min. Added to the supernatant was 3 µL of IS (1.25 mM  
626 sinigrin (Sigma-Aldrich) in 80% (v/v) ethanol) per mg sample dry weight. Extract was  
627 applied to and incubated on the ion exchanger for 10 min. The sephadex resin was  
628 washed three times with 70% (v/v) methanol, three times with distilled deionized water  
629 (ddH<sub>2</sub>O), and two times with 20 mM sodium acetate (pH 5). 20µL of 25 mg/mL aryl  
630 sulfatase (Type H1 from *Helix pomatia*, Sigma-Aldrich) was applied to and incubated  
631 on the sephadex resin at RT overnight (Hogge *et al.*, 1988). The plate was centrifuged  
632 at 400xg for 1 min, and desulfoglucosinolates were eluted from the sephadex resin by  
633 two 100-µL washes with 60% (v/v) methanol and two 100-µL washes with ddH<sub>2</sub>O.  
634 Eluate volume was reduced to 250-350 µL using an evaporator. Samples were  
635 separated using the gradient shown in Supplementary Table 7. A coupled DAD-  
636 3000RS diode array detector, FLD-311 fluorescence detector (Dionex), and MSQPlus  
637 mass spectrometer collected UV absorption spectra at 229-nm, fluorescence spectra

638 at 275/350-nm (ex/em), and ESI mass spectra in positive/negative ion modes at 100-  
639 1000 m/z, respectively. Glucosinolates were quantified using integrated areas of  
640 desulfo glucosinolates in the UV chromatographs at 229-nm and published response  
641 factors (Clarke, 2010).

642

643 **Chromatin immunoprecipitation and (q)PCR.** ChIP was performed as previously  
644 described by Chezem et al. (2017) with some modifications. Approximately two-  
645 hundred-and-ten 9-day-old seedlings were inoculated with *Pto* DC3000 *avrRpm1* to  
646 OD<sub>600</sub> of 0.013 and co-treated with mock solution of DMSO (M) or 20 μM  
647 dexamethasone (D) for 9 hr. Following nuclear extraction, samples were sonicated in a  
648 Covaris S2 sonicator (Covaris, Woburn, MA) using 10% duty, 7% intensity, 200 cycles  
649 per burst for a total time of 11 min. Chromatin immunoprecipitation was performed  
650 using Anti-FLAG M2 Affinity Gel (Sigma-Aldrich). Beads were pre-treated with 0.1%  
651 (w/v) non-fat milk in 1X PBS and 0.5 mg/mL sheared salmon sperm DNA (Invitrogen).  
652 Following de-crosslinking, DNA samples were phenol-chloroform-extracted and diluted  
653 to a common concentration prior to PCR. 1.5uL immunoprecipitated ChIP-DNA was  
654 used in a 15mL PCR reaction. PCR analysis was performed on nuclear extracts prior to  
655 antibody incubation (input) and after ChIP. PCR conditions were as follows: 95°C for 3  
656 min; 40 cycles of 95°C for 15 sec, 53°C for 15 sec, and 72°C for 1 min; 72°C for 5 min.  
657 Densitometric determination of signal intensity in each ChIP and input sample was  
658 calculated using ImageJ. Fold enrichment was determined by calculating the ratio of  
659 PCR product intensities in ChIP D/M to Input D/M. In cases where amplicons were  
660 absent, an arbitrary value of 10 was assigned. For *EPL2*, qPCR analysis was

661 additionally performed to confirm absence of amplicons in ChIP samples. RLU counts  
662 at the 25<sup>th</sup> cycle were used for quantification. Primer sequences are listed in  
663 Supplementary Table 6.

664

665 **Comparative genomics.** All phylogenetic species trees were adapted from Koch and  
666 Kiefer (2005) and Couvreur et al. (2009). To generate novel phylogenetic maximum  
667 likelihood (ML) trees, sequences were aligned using MUSCLE in MEGA7 (Kumar *et al.*,  
668 2016) and JTT model (for CYP82C and LINE alignments) or Tamura-Nei model (for the  
669 *EPCOT3* alignment). Sequences for all genes with the description “non-LTR  
670 retrotransposon family (LINE)” (N=263) were batch-downloaded from TAIR  
671 (<https://arabidopsis.org>). Of these, sequences containing intact reverse transcriptase  
672 domains (“PGPDG”, “LIPK”, “FRPISL”, or “FADD” sequences; N=126) were used for  
673 subsequent phylogenetic analysis. Gaps were removed from the CYP82C alignment,  
674 leaving a total of 480 codons. *EPCOT3* alignments were visualized in JalView  
675 (<http://www.jalview.org/>; Waterhouse *et al.*, 2009). Information on genomes used for  
676 synteny analysis is shown in Supplementary Table 8.

677

678 Selection estimates based on nonsynonymous-to-synonymous substitution ratios were  
679 calculated from the CYP82C ML tree (Supplementary Text 1). A Newick tree file was  
680 generated from this ML tree (Supplementary Figure 4b; Supplementary Table 2) and for  
681 Branch site models, branches were pre-defined. CodeML analysis in PAML (Yang,  
682 2007) was then conducted with the following modified parameters: ncatG = 8;  
683 CodonFreq = 3. The M0 test was performed with model = 0 and NSsites = 0. The M1a

684 null test was performed with model = 0 and NSsites = 1. A more stringent null test  
685 (fixed omega) was performed for each Branch site model to be tested (model = 2 and  
686 NSsites = 2), where omega was fixed to 1. Branch site models were then tested with  
687 unfixed omega. Likelihood ratio tests were performed by comparing critical values and  
688 degrees of freedom between each unfixed Branch site test and either the M1a test or  
689 the corresponding fixed-omega test. Pre-defined branches with *P* values less than 0.05  
690 for both tests were regarded as under positive selection (Supplementary Figure 2).

691  
692 The protein structure of CYP82C2 was generated using Intensive modeling mode in  
693 Phyre2 (<http://www.sbg.bio.ic.ac.uk/phyre2/html/page.cgi?id=index>; Kelley *et al.*, 2015)  
694 and visualized in MacPyMOL (Schrödinger, LLC). Amino acid conservation was scored  
695 using the Bayesian Best model in ConSurf (<http://consurf.tau.ac.il/2016/>; Ashkenazy *et al.*, 2016).

697  
698 **Bioinformatics.** Coexpression data was obtained from ATTED-ii (<http://atted.jp/>;  
699 Obayashi *et al.*, 2018). Mutual ranks less than 200 are indicative of strong co-  
700 expression (Obayashi *et al.*, 2018). Epigenetics data was obtained from Roudier *et al.*  
701 (2011) and confirmed using data from Liu *et al.* (2018). Percent identity matrices were  
702 constructed from Clustal Omega Multiple Sequence Alignments  
703 (<https://www.ebi.ac.uk/Tools/msa/clustalo/>). Promoter alignment plots were generated  
704 using mVISTA (<http://genome.lbl.gov/vista/mvista/submit.shtml>; Frazer *et al.*, 2004)

705

706 **Data availability**



707 The authors declare that all data supporting the findings of this study are available  
708 within the manuscript and the Supplementary Information or are available from the  
709 corresponding authors upon request.

710

## 711 **References**

712 1001 Genomes Consortium. 1,135 genomes reveal the global pattern of polymorphism  
713 in *Arabidopsis thaliana*. *Cell* **166**(2), 481-491 (2016).

714 Aoyama, T. & Chua, N.H. A glucocorticoid-mediated transcriptional induction system  
715 in transgenic plants. *Plant J* **11**(3), 605–612 (1997).

716 Ashkenazy, H. *et al.* ConSurf 2016: an improved methodology to estimate and  
717 visualize evolutionary conservation in macromolecules. *Nucleic Acids Res*  
718 **44**(W1), W344-W350 (2016).

719 Birkenbihl, R.P., Diezel, C., Somssich, I.E. Arabidopsis WRKY33 is a key transcriptional  
720 regulator of hormonal and metabolic responses toward *Botrytis cinerea* infection.  
721 *Plant Physiol* **159**(1), 266-285 (2012).

722 Birkenbihl, R.P., Kracher, B., Somssich, I.E. Induced Genome-Wide Binding of Three  
723 Arabidopsis WRKY Transcription Factors during Early MAMP-Triggered Immunity.  
724 *Plant Cell* **29**(1), 20-38 (2017).

725 Bisgrove, S.R., Simonich, M.T., Smith, N.M., Sattler, A., Innes, R.W. A disease  
726 resistance gene in Arabidopsis with specificity for two different pathogen avirulence  
727 genes. *Plant Cell* **6**(7), 927-933 (1994).

- 728 Bonn, S. *et al.* Tissue-specific analysis of chromatin state identifies temporal signatures  
729 of enhancer activity during embryonic development. *Nat Genet* **44**(2), 148-156  
730 (2012).
- 731 Bourque, G. Transposable elements in gene regulation and in the evolution of  
732 vertebrate genomes. *Curr Opin Genet Dev* **19**(6), 607-612.
- 733 Böttcher, C. *et al.* The multifunctional enzyme CYP71B15 (PHYTOALEXIN  
734 DEFICIENT3) converts cysteine-indole-3-acetonitrile to camalexin in the indole-3-  
735 acetonitrile metabolic network of *Arabidopsis thaliana*. *Plant Cell* **21**(6), 1830-1845  
736 (2009).
- 737 Cabrera, J.C., Messiaen, J., Cambier, P., Van Cutsem, P. Size, acetylation and  
738 concentration of chitoooligosaccharide elicitors determine the switch from defence  
739 involving PAL activation to cell death and water peroxide production in *Arabidopsis*  
740 cell suspensions. *Physiol Plant* **127**(1), 44-56 (2006).
- 741 Camara, M.D., Ancell, C.A., Pigliucci, M. Induced mutations: a novel tool to study  
742 phenotypic integration and evolutionary constraints in *Arabidopsis thaliana*. *Evol*  
743 *Ecol Res* **2**(8), 1009-1029 (2000).
- 744 Chae, L., Kim, T., Nilo-Poyanco, R., Rhee, S.Y. Genomic signatures of specialized  
745 metabolism in plants. *Science* **344**(6183), 510-513 (2014).
- 746 Chatfield, S.P. & Raizada, M.M. Ethylene and shoot regeneration: hookless1 modulates  
747 de novo shoot organogenesis in *Arabidopsis thaliana*. *Plant Cell Rep* **27**(4), 655-666  
748 (2008).

- 749 Chan, Y.F. *et al.* Adaptive evolution of pelvic reduction in sticklebacks by recurrent  
750 deletion of a *Pitx1* enhancer. *Science* **237**(5963), 302-305 (2010).
- 751 Chuong, E.B., Elde, N.C., Feschotte, C. Regulatory evolution of innate immunity  
752 through co-option of endogenous retroviruses. *Science* **351**(6277), 1083-1087  
753 (2016).
- 754 Clarke, D.B. Glucosinolates, structures and analysis in food. *Anal Methods* **2**(4), 301-  
755 416 (2010).
- 756 Clay, N.K., *et al.* Glucosinolate metabolites required for an Arabidopsis innate immune  
757 response. *Science* **323**(5910), 95-101 (2009).
- 758 Clough, S.J. & Bent, A.F. Floral dip: a simplified method for Agrobacterium-mediated  
759 transformation of *Arabidopsis thaliana*. *Plant J* **16**(6), 735-743 (1998).
- 760 Couvreur, T.L.P. *et al.* Molecular phylogenetics, temporal diversification, and  
761 principles of evolution in the mustard family (Brassicaceae) *Mol Biol Evol* **27**(1),  
762 55-71 (2009).
- 763 de Souza, F.S.J., Franchini, L.F., Rubinstein, M. Exaptation of transposable elements  
764 into novel cis-regulatory elements: is the evidence always strong? *Mol Biol Evol*  
765 **30**(6), 1239-1251 (2013).
- 766 Debener T., Lehnackers H., Arnold M., Dangl J.L. Identification and molecular mapping  
767 of a single Arabidopsis thaliana locus determining resistance to a phytopathogenic  
768 Pseudomonas syringae isolate. *Plant J* **1**(3), 289-302 (1991).
- 769 Dixon, R.A. & Strack. D. Phytochemistry meets genome analysis and beyond.  
770 *Phytochemistry* **62**(6), 815-816 (2003).

- 771 Denoux, C. *et al.* Activation of defense response pathways by OGs and Flg22 elicitors  
772 in Arabidopsis seedlings. *Mol Plant* **1**(3), 423-445 (2008).
- 773 Feschotte, C. Transposable elements and the evolution of regulatory networks. *Nat Rev*  
774 *Genet* **9**(5), 397-405 (2008).
- 775 Felix G., Duran J.D., Volko S., Boller T. Plants have a sensitive perception system for  
776 the most conserved domain of bacterial flagellin. *Plant J* **18**(3),265-276 (1999).
- 777 Force, A.M. *et al.* Preservation of duplicate genes by complementary, degenerative  
778 mutations. *Genet* **151**(4), 1531-1545 (1999).
- 779 Frazer, K.A. *et al.* VISTA: computational tools for comparative genomics. *Nucleic*  
780 *Acids Res* **32**(Web Server issue), W273-W279 (2004).
- 781 Glawischnig, E., Hansen, B.G., Olsen, C.E., Halkier, B.A. Camalexin is synthesized  
782 from indole-3-acetaldoxime, a key branching point between primary and secondary  
783 metabolism in Arabidopsis. *Proc Natl Acad Sci USA* **101**(21), 8245-8250 (2004).
- 784 Grotewold, E. Plant metabolic diversity: a regulatory perspective. *Trends Plant Sci*  
785 **10**(2), 57-62 (2005).
- 786 Hammerschmidt, R. PHYTOALEXINS: What have we learned after 60 years? *Annu Rev*  
787 *Phytopathol* **37**, 285-306 (1999).
- 788 Hardtke, C.S., Müller, J., Berleth, T. Genetic similarity among *Arabidopsis thaliana*  
789 ecotypes estimated by DNA sequence comparison. *Plant Mol Biol* **32**(5), 915-922  
790 (1996).
- 791 Hartmann, T. From waste products to ecochemicals: fifty years research of plant  
792 secondary metabolism. *Phytochemistry* **68**(22-24), 2831-2846 (2007).

- 793 Heintzman, N.D. *et al.* (2007) Distinct and predictive chromatin signatures of  
794 transcriptional promoters and enhancers in the human genome. *Nat Genet* **39**(3),  
795 311-318 (2007).
- 796 Hénaff, E., Vives, C., Desvoves, B., Chaurasia, A., Payet, J., Gutierrez, C.,  
797 Casacuberta, J.M. Extensive amplification of the E2F transcription factor binding  
798 sites by transposons during evolution of Brassica species. *Plant J* **77**(6), 852-862  
799 (2014).
- 800 Hoffman, B.G. *et al.* Locus co-occupancy, nucleosome positioning, and H3K4me1  
801 regulate the functionality of FOXA2-, HNF4A-, and PDX1-bound loci in islets and  
802 liver. *Genome Res* **20**(8), 1037-1061 (2010).
- 803 Hogge, L.R., Reed, D.W., Underhill, E.W., Haughn, G.W. HPLC separation of  
804 glucosinolates from leaves and seeds of *Arabidopsis thaliana* and their  
805 identification using thermospray liquid chromatography-mass spectrometry. *J*  
806 *Chromatogr Sci* **26**, 551-556 (1988).
- 807 Hohmann, N., Wolf, E.M., Lysak, M.A., Koch, M.A. A time-calibrated road map of  
808 Brassicaceae species radiation and evolutionary history. *Plant Cell* **27**(10), 2770-  
809 2784 (2015).
- 810 Hu, T.T. *et al.* The *Arabidopsis lyrata* genome sequence and the basis of rapid genome  
811 size change. *Nat Genet* **43**(5), 476-481 (2011).
- 812 Hugouvieux, V., Barber, C.E., Daniels, M.M. Entry of *Xanthomonas campestris* pv.  
813 *campestris* into hydathodes of *Arabidopsis thaliana* leaves: a system for studying

814 early infection events in bacterial pathogenesis. *Mol Plant-Microbe Interact* **11**(6),  
815 537-543 (1998).

816 Jones, J.D.G. & Dangl, J.L. The plant immune system. *Nature* **444**(7117), 323-329  
817 (2006).

818 Kagan, I.A. & Hammerschmidt, R. Arabidopsis ecotype variability in camalexin  
819 production and reaction to infection by *Alternaria brassicicola*. *J Chem Ecol* **28**(11),  
820 2121-2140 (2002).

821 Kelley, L.A. *et al.* The Phyre2 web portal for protein modeling, prediction and  
822 analysis. *Nat Protoc* **10**(6), 845-858 (2015).

823 Klein, A.P., Anarat-Cappillino, G., Sattely, E.S. Minimum set of cytochromes P450 for  
824 reconstituting the biosynthesis of camalexin, a major Arabidopsis antibiotic. *Angew*  
825 *Chem Int Ed Engl* **52**(51), 13625-13628 (2013).

826 Kliebenstein, D.J. *et al.* Genetic control of natural variation in Arabidopsis  
827 glucosinolate accumulation. *Plant Physiol* **126**(2), 811-825 (2001).

828 Koch, M.A. & Kiefer, M. Genome evolution among cruciferous plants: a lecture from  
829 the comparison of the genetic maps of three diploid species—*Capsella rubella*,  
830 *Arabidopsis lyrata* subsp. *petraea*, and *A. thaliana*. *Am J Bot* **92**(4), 761-767  
831 (2005).

832 Kover, P.X. & Schaal, B.A. Genetic variation for disease resistance and tolerance  
833 among Arabidopsis thaliana accessions. *Proc Natl Acad Sci USA* **99**(17), 11270-  
834 11274 (2002).

- 835 Kruse, T. *et al.* In planta biocatalysis screen of P450s identifies 8-methoxypsoralen as a  
836 substrate for the CYP82C subfamily yielding original chemical structures. *Chem Biol*  
837 **15**(2), 149-156 (2008).
- 838 Kumar, S., Stecher, G., Tamura, K. MEGA7: molecular evolutionary genetics  
839 analysis version 7.0 for bigger datasets. *Mol Biol Evol* **33**(7), 1870-1874 (2016).
- 840 Levine, M. & Davidson, E.H. Gene regulatory networks for development. *Proc Natl Acad*  
841 *Sci USA* **102**(14), 4936-4942 (2005).
- 842 Li, G. *et al.* Dual-level regulation of ACC synthase activity by MPK3/MPK6 cascade and  
843 its downstream WRKY transcription factor during ethylene induction in Arabidopsis.  
844 *PLoS Genet* **8**(6), e1002767 (2012).
- 845 Liu, S. *et al.* Negative regulation of ABA signaling by WRKY33 is critical for Arabidopsis  
846 immunity towards *Botrytis cinerea* 2100. *eLife* **4**, e07295 (2015).
- 847 Liu, Y. *et al.* PCSD: a plant chromatin state database. *Nucleic Acids Res* **46**(D1),  
848 D1157-D1167 (2018).
- 849 Luan, D.D., Korman, M.H., Jakubczak, J.L., Eickbush, T.H. Reverse transcription of  
850 R2Bm RNA is primed by a nick at the chromosomal target site: a mechanism for  
851 non-LTR retrotransposition. *Cell* **72**(4), 595-605 (1993).
- 852 Lynch, M. The lower bound to the evolution of mutation rates. *Genome Biol Evol* **3**,  
853 1107-1118 (2011).
- 854 Malik, H.S., Burke, W.D., Eickbush, T.H. The age and evolution of non-LTR  
855 retrotransposable elements. *Mol Biol Evol* **16**(6), 793-805 (1999).

- 856 Mansfield, J.W. Antimicrobial compounds and resistance: the role of phytoalexins and  
857 phytoanticipins. In *Mechanisms of Resistance to Plant Diseases*, A. Slusarenko,  
858 RSS Fraser and LC. van Loon eds (Kluwer Academic Publishers Dordrecht, The  
859 Netherlands), pp. 325-370 (2000).
- 860 Martin, C., Ellis, N., Rook, F. Do transcription factors play special roles in adaptive  
861 variation? *Plant Physiol* **154**(2), 506-511 (2010).
- 862 McClintock, B. Controlling elements and the gene. *Cold Spring Harb Symp Quant Biol*  
863 **21**, 197-216 (1956).
- 864 McNellis, T.W. *et al.* Glucocorticoid-inducible expression of a bacterial avirulence  
865 gene in transgenic Arabidopsis induces hypersensitive cell death. *Plant J* **14**(2),  
866 247-257 (1998).
- 867 Moore, R.C. & Purugganan, M.D. The evolutionary dynamics of plant duplicate genes.  
868 *Curr Opin Plant Biol* **8**(2), 122-128 (2005).
- 869 Mukherjee, A.K., Lev, S., Gepstein, S., Horwitz, B.B. A compatible interaction of  
870 *Alternaria brassicicola* with *Arabidopsis thaliana* ecotype DiG: evidence for a specific  
871 transcriptional signature. *BMC Plant Biol* **9**(1), 31 (2009).
- 872 Müller, A.A. Die Induktion von rezessiven Letalmutationen durch Äthylmethansulfonat  
873 bei Arabidopsis. *Theor Appl Genet* **36**(5), 201-220 (1966).
- 874 Murashige, T. & Skoog, F. A revised medium for rapid growth and bio assays with  
875 tobacco tissue cultures. *Physiol Plant* **15**(3), 473-497 (1962).



- 876 Murgia, I., Tarantino, D., Soave, C., Morandini, P. Arabidopsis *CYP82C4* expression is  
877 dependent on Fe availability and circadian rhythm, and correlates with genes  
878 involved in the early Fe deficiency response. *J Plant Physiol* **168**(9), 894-902 (2011).
- 879 Nafisi, M. *et al.* Arabidopsis cytochrome P450 monooxygenase 71A13 catalyzes the  
880 conversion of indole-3-acetaldoxime in camalexin synthesis. *Plant Cell* **19**(6), 2039-  
881 2052 (2007).
- 882 Navarro, L. *et al.* The transcriptional innate immune response to flg22. Interplay and  
883 overlap with Avr gene-dependent defense responses and bacterial pathogenesis.  
884 *Plant Physiol* **135**(2), 1113-1128 (2004).
- 885 Obayashi, T. *et al.* ATTED-II in 2018: A plant coexpression database based on  
886 investigation of statistical property of Mutual Rank Index. *Plant Cell Physiol* **59**(1),  
887 e3 (2018).
- 888 Ohno, S. Evolution by Gene Duplication. Springer-Verlag: Heidelberg, Germany (1970).
- 889 Omranian, N. *et al.* Differential metabolic and coexpression networks of plant  
890 metabolism. *Trends Plant Sci* **20**(5), 266-268 (2015).
- 891 Pfaffl, M.W. A new mathematical model for relative quantification in real-time RT-  
892 PCR. *Nucleic Acids Res* **29**(9), e45 (2001).
- 893 Povero, G. *et al.* Transcript profiling of chitosan-treated Arabidopsis seedlings. *J Plant*  
894 *Res* **124**(5), 619-629 (2011).
- 895 Prud'homme, B., Gompel, N., Carroll, S.B. Emerging principles of regulatory evolution.  
896 *Proc Natl Acad Sci USA* **104**(Suppl 1), 8605-8612 (2007).

- 897 Qiu, J.L. *et al.* Arabidopsis MAP kinase 4 regulates gene expression through  
898 transcription factor release in the nucleus. *EMBO J* **27**(16), 2214-2221 (2008).
- 899 Rajniak, J., Barco, B., Clay, N.K., Sattely, E.S. A new cyanogenic metabolite in  
900 Arabidopsis required for inducible pathogen defence. *Nature* **525**(7569), 376-379  
901 (2015).
- 902 Rajniak, J. *et al.* Biosynthesis of redox-active metabolites in response to iron deficiency  
903 in plants. *Nat Chem Biol* **14**(5), 442-450 (2018).
- 904 Rédei, G.P. Single locus heterosis. *Zeitschrift für Vererbungslehre* **93**(1), 164-170  
905 (1962).
- 906 Rédei, G.P. & Koncz, C. Classical mutagenesis. In *Methods in Arabidopsis Research*,  
907 pp. 16-82 (1993).
- 908 Rinerson, C.I. *et al.* The evolution of WRKY transcription factors. *BMC Plant Biol* **15**, 66  
909 (2015).
- 910 Rogers, W.A., *et al.* Recurrent modification of a conserved *cis*-regulatory element  
911 underlies fruit fly pigmentation diversity. *PLoS Genet* **9**(8), e1003740 (2013).
- 912 Roudier, F. *et al.* Integrative epigenomic mapping defines four main chromatin states in  
913 Arabidopsis. *EMBO J* **30**(10), 1928-1938 (2011).
- 914 Rushton, P.J., Somssich, I.E., Ringler, P., Shen, Q.J. WRKY transcription factors.  
915 *Trends Plant Sci* **15**(5), 247-258 (2010).
- 916 Schluttenhofer, C. & Yuan, L. (2015) Regulation of specialized metabolism by WRKY  
917 transcription factors. *Plant Physiol* **167**(2), 295-306 (2015).

- 918 Slattery, M. *et al.* Absence of a simple code: how transcription factors read the genome.  
919 *Trends Biochem Sci* **39**(9), 381-399 (2014).
- 920 Slotkin, R. K, & Martienssen, R. Transposable elements and the epigenetic regulation of  
921 the genome. *Nat Rev Genet* **8**(4), 272 (2007).
- 922 Spitz, F. & Furlong, E.E. Transcription factors: from enhancer binding to developmental  
923 control. *Nat Rev Genet* **13**(9), 613-626 (2012).
- 924 Tao, Y. *et al.* Quantitative nature of Arabidopsis responses during compatible and  
925 incompatible interactions with the bacterial pathogen *Pseudomonas syringae*. *Plant*  
926 *Cell* **15**(2), 317-330 (2003).
- 927 Thomma, B.P., Nelissen, I., Eggermont, K., Broekaert, W.F. Deficiency in phytoalexin  
928 production causes enhanced susceptibility of *Arabidopsis thaliana* to the fungus  
929 *Alternaria brassicicola*. *Plant J* **19**(2), 163-171 (1999).
- 930 Tsuji, J. *et al.* (1992) Phytoalexin accumulation in *Arabidopsis thaliana* during the  
931 hypersensitive reaction to *Pseudomonas syringae* pv *syringae*. *Plant Physiol* **98**(4),  
932 1304-1309 (1992).
- 933 Tohge, T. & Fernie, A.R. Co-expression and co-responses: within and beyond  
934 transcription. *Front Plant Sci* **3**, 248 (2012).
- 935 Wang, Y., Li, X., Hu, H. H3K4me2 reliably defines transcription factor binding regions in  
936 different cells. *Genomics* **103**(2), 222-228 (2014).
- 937 Waterhouse, A.M. *et al.* Jalview Version 2—a multiple sequence alignment editor  
938 and analysis workbench. *Bioinformatics* **25**(9), 1189-1191 (2009).

- 939 Weng, J.K., Philippe, R.N., Noel, J.P. (2012) The rise of chemodiversity in plants.  
940 *Science* **336**(6089), 1667-1670 (2012).
- 941 Wicker, T. *et al.* A unified classification system for eukaryotic transposable elements.  
942 *Nat Rev Genet* **8**(12), 973-982 (2007).
- 943 Wink, M. Evolution of secondary metabolites from an ecological and molecular  
944 phylogenetic perspective. *Phytochemistry* **64**(1), 3-19 (2003).
- 945 Wittkopp, P.J. & Kalay, G. *Cis*-regulatory elements: molecular mechanisms and  
946 evolutionary processes underlying divergence. *Nat Rev Genet* **13**(1), 59-69 (2012).
- 947 Wray, G.A. The evolutionary significance of *cis*-regulatory mutations. *Nat Rev Genet*  
948 **8**(3), 206-216 (2007).
- 949 Zhao, Y. *et al.* (2002) Trp-dependent auxin biosynthesis in Arabidopsis: involvement of  
950 cytochrome P450s CYP79B2 and CYP79B3. *Genes Dev* **16**(23), 3100-3112 (2002).
- 951 Zheng, Z., Qamar, S.A., Chen, Z., Mengiste, T. (2006) Arabidopsis WRKY33  
952 transcription factor is required for resistance to necrotrophic fungal pathogens. *Plant*  
953 *J* **48** (4), 592-605 (2006).
- 954 Zhou, J., Wang, J., Zheng, Z., Fan, B., Yu, J. Q., Chen, Z. Characterization of the  
955 promoter and extended C-terminal domain of Arabidopsis WRKY33 and functional  
956 analysis of tomato WRKY33 homologues in plant stress responses. *J Exp Bot*  
957 **66**(15), 4567-4583 (2015).
- 958 Zipfel, C., Kunze, G., Chinchilla, D., Caniard, A., Jones, J. D., Boller, T., & Felix, G.  
959 Perception of the bacterial PAMP EF-Tu by the receptor EFR restricts  
960 Agrobacterium-mediated transformation. *Cell* **125**(4), 749-760 (2006).

961

962 **Acknowledgements**

963 We thank E.S. Sattely for ICN/ICN-ME, 4OH-ICA/4OH-ICA-ME and camalexin  
964 standards. This work was supported by T32-GM007499 (to B.B.) and  
965 Elsevier/Phytochemistry Young Investigator Award (to N.K.C.).

966

967 **Author Contributions**

968 B.B. and N.K.C performed pathogen assays and ChIP-PCR experiments. B.B. and Y.K.  
969 profiled accessions and species. B.B. performed all other experiments. B.B. and N.K.C.  
970 interpreted the results and wrote the paper.

971

972 **Competing Interests**

973 The authors declare no competing interests.

974

975 **Materials & Correspondence**

976 Correspondence and material requests can be addressed to Brenden Barco.
